1 **ADAMTS-family protease MIG-17 regulates synaptic allometry by**  
2 **modifying the extracellular matrix and modulating glia morphology**  
3 **during growth**

4 Tingting Ji<sup>1#</sup>, Kai Wang<sup>1#</sup>, Jiale Fan<sup>1#</sup>, Jichang Huang<sup>2</sup>, Mengqing Wang<sup>1</sup>,  
5 Xiaohua Dong<sup>1</sup>, Yanjun Shi<sup>1</sup>, Laura Manning<sup>3</sup>, Xumin Zhang<sup>2</sup>, Zhiyong Shao<sup>1\*</sup>,  
6 Daniel A. Colón-Ramos<sup>3,4\*</sup>

7

8 1: Department of Neurosurgery, State Key Laboratory of Medical Neurobiology,  
9 Collaborative Innovation Center for Brain Science and the Institutes of Brain  
10 Science, Zhongshan Hospital, Fudan University Shanghai, 200032, China

11 2: State Key Laboratory of Genetic Engineering, Department of Biochemistry,  
12 School of Life Sciences, Fudan University, Shanghai 200438, China

13 3: Program in Cellular Neuroscience, Neurodegeneration and Repair,  
14 Department of Neuroscience and Department of Cell Biology, Yale University  
15 School of Medicine

16 4: Instituto de Neurobiología, Recinto de Ciencias Médicas, Universidad de  
17 Puerto Rico, 201 Blvd del Valle, San Juan, Puerto Rico

18 # These authors contribute equally

19 \*Co-Corresponding authors

20

21 **Running title: ADAMTS MIG-17 modulates synaptic allometry**

22

23 **Keywords:** Synaptic allometry, ADAMTS family protease, MIG-17,  
24 Extracellular matrix, Basement membrane, Glia

25

26 **Corresponding authors:**

27 Zhiyong Shao

28 Institute of Brain Science

29 Fudan University  
30 131 DongAn Road, Mingdao Building 1016  
31 Shanghai, Shanghai, 200032, China  
32 Phone: 86-21-54237662  
33 Email: [shaozy@fudan.edu.cn](mailto:shaozy@fudan.edu.cn)

34  
35 Daniel A. Colón-Ramos  
36 Program in Cellular Neuroscience, Neurodegeneration and Repair,  
37 Department of Neuroscience and Department of Cell Biology, Yale University  
38 School of Medicine  
39 333 Cedar Street, SHM B 163D  
40 New Haven, CT 06510  
41 Telephone: 203-737-3438  
42 Fax: 203-785-5098  
43 Email: [daniel.colon-ramos@yale.edu](mailto:daniel.colon-ramos@yale.edu)

44  
45  
46  
47  
48  
49  
50  
51  
52  
53  
54  
55  
56

57 **ABSTRACT**

58 Synapses are largely established during embryogenesis and maintained during  
59 growth. The mechanisms that regulate synaptic allometry—the maintenance of  
60 synaptic positions during growth—are largely unknown. We performed forward  
61 genetic screens in *C. elegans* for synaptic allometry mutants and identified *mig-*  
62 *17*, a secreted metalloprotease of the conserved ADAMTS family. Through  
63 proteomic mass spectrometry analyses, cell biological and genetic studies we  
64 determined that MIG-17 is expressed by muscle cells to modulate glia location  
65 and morphology. Glia are proximal to synapses, and the glial location and  
66 morphology determine synaptic position during growth. *Mig-17* regulates  
67 synapse allometry by influencing epidermal-glia crosstalk through the  
68 regulation of basement membrane proteins, including collagen type IV, SPARC  
69 and fibulin. Our findings underscore the importance of glia location in the  
70 maintenance of synaptic allometry, and uncover a muscle-epidermal-glia  
71 signaling axis, mediated through the extracellular matrix, in the regulation of  
72 glia morphology and synaptic positions during growth.

73

74

75

76

77

78

## 79 INTRODUCTION

80 Nervous system architecture and function depend on precise  
81 connectivity between pre- and post-synaptic partners. Circuit architecture can  
82 also be maintained during the lifetime of the organism (Benard and Hobert,  
83 2009). The mechanisms that preserve synaptic specificity during post-  
84 embryonic growth remain largely unknown.

85 Most of our understanding of synaptic specificity comes from  
86 developmental studies examining precise positioning of synapses during their  
87 biogenesis (Rawson et al., 2017; Park et al., 2018; Kurshan and Shen, 2019).  
88 From these studies we know that precise connectivity during development  
89 occurs through orchestrated signaling across multiple tissues. For example, *in*  
90 *vivo* studies have revealed that while cell-cell recognition and signaling between  
91 synaptic partners is important for synaptogenesis, non-neuronal cells also  
92 guide synaptic specificity (Colon-Ramos, 2009; Sanes and Yamagata,  
93 2009; Margeta and Shen, 2010; Shimozone et al., 2019). During development,  
94 synaptic specificity can be instructed by guidepost cells through the secretion  
95 of positional cues in the form of morphogenic extracellular signaling molecules  
96 (Ullian et al., 2001; Shen and Bargmann, 2003; Colon-Ramos et al., 2007; Ango  
97 et al., 2008; Eroglu and Barres, 2010; Tsai et al., 2012; Molofsky et al., 2014).

98 Post-embryonic maintenance of synapses has been mainly examined at  
99 the level of identifying molecular factors necessary for maintaining synaptic  
100 stability, density and morphology (Lin and Koleske, 2010; Luo et al.,  
101 2014; Cherra and Jin, 2016; Sytnyk et al., 2017; Burden et al., 2018; Hasan and  
102 Singh, 2019). Less is known about factors required for maintaining the position  
103 of synapses, particularly during post-embryonic growth. As an animal grows,  
104 organs scale in different proportions relative to body size, a fact that has long  
105 been recognized by biologists and is termed “allometry” (Huxley, 1924; Huxley  
106 J, 1936). For example, brain neocortical white matter and neo-cortical grey

107 matter scale different from each other, indicating that specific sub-structures of  
108 the brain scale allometrically to total brain size (de Jong et al., 2017). It remains  
109 largely unknown, as different tissues disproportionately scale in size during  
110 organismal growth, how embryonically-derived synaptic distribution is retained  
111 to maintain circuit architecture.

112 Like synapses, axon positions are also maintained during growth, and  
113 genetic studies in *C. elegans* have identified molecules specifically required for  
114 this process, such as L1-CAM, F-spondin and the ecto-domain of the FGF  
115 Receptor (Aurelio et al., 2002; Aurelio et al., 2003; Hobert and Bulow,  
116 2003; Bulow et al., 2004; Benard et al., 2006; Pocock et al., 2008; Woo et al.,  
117 2008; Zhou et al., 2008; Benard et al., 2009; Benard et al., 2012; Noblett et al.,  
118 2019; Ramirez-Suarez et al., 2019). These studies uncover two important  
119 features regarding maintenance of axon positions during growth. First, the  
120 signaling pathways required for maintaining axon positions are different from  
121 those required for establishing axon positions during development. Second,  
122 these studies suggest that secreted factors in the extracellular matrix (ECM)  
123 play important roles in axon position maintenance.

124 The ECM is a network of macromolecules important for cell-cell  
125 interactions, signaling and maintenance of tissue morphogenesis (Jayadev and  
126 Sherwood, 2017; Song and Dityatev, 2018). The ECM is a dynamic structure  
127 that remodels in part through the activity of ADAMTS metalloproteases (Kelwick  
128 et al., 2015). Genetic studies in *C. elegans*, *Drosophila* and humans highlight  
129 the importance of ADAMTS metalloproteases for post-embryonic development  
130 (Jafari et al., 2010; Meyer et al., 2014; Skeath et al., 2017; Mead and Apte, 2018).  
131 Human genetic disorders that affect ADAMTS metalloproteases result in  
132 neurodegenerative disorders (Gottschall and Howell, 2015; Rivera et al., 2019),  
133 vascular diseases (Zhong and Khalil, 2019), birth defects and short stature,  
134 among other diseases (Binder et al., 2017; Mead and Apte, 2018). The ECM is

135 also an important structure for the development and maintenance of  
136 neuromuscular junctions (NMJ), and disruption of ECM components, including  
137 ADAMTS metalloproteases, affects post-embryonic maintenance of NMJ  
138 morphology (Singhal and Martin, 2011;Kurshan et al., 2014;Qin et al.,  
139 2014;Dear et al., 2016;Cescon et al., 2018;Heikkinen et al., 2019) The role of  
140 ECM in the maintenance of CNS neuron-neuron synapses remains less  
141 understood (Heikkinen et al., 2014;Krishnaswamy et al., 2019), particularly  
142 during brain allometric growth.

143 The nematode *C. elegans* provides a tractable genetic model for  
144 examining questions related to synaptic allometry—how maintenance of correct  
145 synaptic contact, and prevention of formation of inappropriate contacts, are  
146 regulated during growth to preserve circuit architecture (Shao et al., 2013). *C.*  
147 *elegans* hatches from its egg as a miniature version of the adult, and grows two  
148 orders of magnitude in volume during post-embryonic growth (Knight et al.,  
149 2002). The architecture of the nervous system, which is laid out in  
150 embryogenesis, is largely preserved during this process (Benard and Hobert,  
151 2009). Single neurons of known identity can be tracked during the lifetime of  
152 the organism using cell-specific promoters, along with *in vivo* probes for  
153 visualization of their synaptic positions (Nonet, 1999;Colon-Ramos et al.,  
154 2007).

155 We established a system in *C. elegans* to study synaptic allometry *in*  
156 *vivo*, and from forward genetic screens identified *cima-1* as a gene required for  
157 synaptic allometry (Shao et al., 2013). In *cima-1* mutants, synaptic contacts are  
158 correctly established during embryogenesis, but ectopic synapses emerge as  
159 the animals grow. *cima-1* encodes a novel solute carrier in the SLC17 family of  
160 transporters that includes Sialin, a protein that when mutated in humans results  
161 in neurological disorders (Verheijen et al., 1999). Rather than functioning in  
162 neurons, *cima-1* functions in the nearby epidermal cells to antagonize the FGF

163 Receptor, most likely by inhibiting its role in epidermal-glia adhesion. Therefore,  
164 *cima-1* functions in non-neuronal cells during post-embryonic growth to  
165 preserve synaptic positions through glia (Shao et al., 2013).

166 To further determine the cellular and molecular mechanisms that  
167 regulate synaptic allometry, we performed suppressor forward genetic screens  
168 in the *cima-1* mutant background, and identified *mig-17*, encoding a secreted  
169 ADAMTS metalloprotease (Nishiwaki et al., 2000). We find that muscle-derived  
170 *mig-17* modulates basement membrane proteins. The basement membrane is  
171 not in direct contact with the affected synapses. Instead, muscle-derived  
172 basement membrane coats the apical side of glia, while glia contact synapses  
173 on their basal side. MIG-17 is regulated during growth, and remodels the  
174 basement membrane to modulate glia morphology, which in turn modulates  
175 synaptic positions during growth. Our findings underscore the *in vivo*  
176 importance of non-neuronal cells in the maintenance of synaptic allometry. Our  
177 findings also uncover a muscle-epidermal-glia signaling axis, modulated by  
178 *mig-17* and the ECM, in regulating synaptic allometry during growth.

179

## 180 **MATERIALS AND METHODS**

### 181 **Strains**

182 All strains were grown at 22°C on NGM agar plates seeded with *Escherichia*  
183 *coli* OP50 (Brenner, 1974) unless specified. *C. elegans* N2 bristol was used as  
184 the wild-type strain.

185 The following mutant alleles were utilized in this study:

186 LGI: *cle-1*(*cg120*)

187 LGII: *unc-52*(*gk3*)

188 LGIII: *emb-9*(*tk75*), *emb-9*(*xd51*), *ina-1*(*gm144*)

189 LGIV: *cima-1*(*wy84*), *fbl-1*(*k201*), *ost-1*(*gk193465*), *ost-1*(*gk786697*)

190 LGV: *mig-17*(*ola226*), *mig-17*(*k113*), *mig-17*(*shc8*), *mig-17*(*shc19*), *nid-*  
191 *1*(*cg118*), *nid-1*(*cg119*)

192 LGX: *let-2(k193)*, *let-2(b246)*, *egl-15(n484)*, *sdn-1(zh20)*

193 The following transgenic lines were used in this study:

194 *shcEx1126*, *shcEx1127* and *shcEx1128*[*Pttx-3::syd-1::GFP*;*Pttx-3::rab-*  
195 *3::mCherry*;*Punc-122::RFP*], *shcEx1146* and *shcEx1147*[*Pmig-17::mig-17*  
196 *genomics*;*Phlh-17::mCherry*], *shcEx1129*[*Pmig-17::mig-17::SL2::GFP*;*Pdpy-*  
197 *4::mCherry*], *shcEx1130*[*Pmig-17::mig-17::SL2::GFP*;*Pmyo-3::mCherry*],  
198 *shcEx1131*[*Pmig-17::mig-17::SL2::GFP*;*Phlh-17::mCherry*], *shcEx1410*[*Pmig-*  
199 *17::mig-17::SL2::GFP*;*Prab-3::mCherry*], *shcEx845*[*Phlh-17::mCherry*],  
200 *shcEx1145*[*Pdpy-4::mCherry*], *shcEx1402*[*Pmyo-3::mCherry*],  
201 *shcEx1403*[*Prab-3::mCherry*], *shcEx1414* and *shcEx1415* [*Pmig-17::mig-*  
202 *17(E303A)*;*Phlh-17::mCherry*], *shcEx1133*, *shcEx1134* and *shcEx1135*[*Pmyo-*  
203 *3::mig-17*;*Phlh-17::mCherry*], *shcEx1136* and *shcEx1137*[*Punc-14::mig-*  
204 *17*;*Phlh-17::mCherry*], *shcEx1139* and *shcEx1140*[*Phlh-17::mig-17*;*Phlh-*  
205 *17::mCherry*], *shcEx1142* and *shcEx1143*[*Pdpy-7::mig-17*;*Punc-122::GFP*],  
206 *qyls46*[*unc119*;*emb-9::mCherry*], *shcEx776*, *shcEx777*, *shcEx778*, *shcEx780*  
207 and *shcEx781*[*Phlh-17::mCherry*;*Pttx-3::GFP::rab-3*], *shcEx424*, *shcEx425*,  
208 *shcEx536*, *shcEx537* and *shcEx538*[*Pdpy-7::egl-15(5A)*;*Phlh-*  
209 *17::mCherry*;*Pttx-3::GFP::rab-3*], *shcEx1252* and *shcEx1253* [*Pmig-17::mig-*  
210 *17(genomic)*;*Phlh-17::mCherry*].

211 Details on strains used in this study are listed in Table S1.

212

### 213 **EMS Screen and mutant identification**

214 To identify *cima-1* suppressors, animals that exhibited normal presynaptic  
215 distribution were isolated from a forward Ethyl Methane-Sulphonate (EMS)  
216 screen performed on the *cima-1(wy84)* mutants. The suppressor *ola226* was  
217 isolated from this screen. The causative genetic lesion was identified through  
218 SNP mapping and whole genome sequencing (Minevich et al., 2012) to be a G  
219 to A point mutation in the first exon of *mig-17*, turning E19 into K in the protein.



220 Fosmid WRM0616aB07, which includes the *mig-17* gene, rescues the  
221 observed suppression of the AIY presynaptic distribution in *cima-1(wy84)*;  
222 *ola226*.

223

## 224 Germline Transformation

225 Transformations were carried out by microinjection of plasmid DNA into the  
226 gonad of adult hermaphrodites (Mello et al., 1991). Plasmids were injected with  
227 5-20ng/ $\mu$ l.

228

## 229 Plasmids

230 The following constructs were created by Gateway cloning (Invitrogen): *Pmig-*  
231 *17::SL2::GFP*; *Pmig-17::mig-17(E303A)::GFP*; *Phlh-17::mig-17*; *Punc-14::mig-*  
232 *17*; *Pdpy-7::mig-17*; *Pmyo-3::mig-17*. The *mig-17* promoter is 1.7kb sequence  
233 upstream from the start codon. The remaining constructs are listed in Table S2.  
234 Detailed cloning information is available upon request.

235 We constructed two Cas9-sgRNAs with pDD162 for each strain according to  
236 the method in (Dickinson et al., 2015). The repair template of *mig-*  
237 *17::mNeonGreen* was modified from pDD268 and is illustrated in Figure S6A.

238 Briefly, *mNeonGreen* was flanked by 1.2kb genomic sequence upstream or  
239 downstream of *mig-17* stop codon. To prevent Cas9 from cutting the donor  
240 template, we also introduced one synonymous mutation in the protospacer  
241 adjacent motif (PAM). The repair template of *mig-17(E303A)* includes 1.2 kb  
242 upstream and 1.2 kb downstream of *mig-17* genomic sequence, which flank the  
243 Glutamic acid at 303 site. We mutated the Glutamic acid (GAA) to Alanine (GCA)  
244 and introduced 8 synonymous mutations to prevent Cas9 from cutting the donor  
245 template (Figure S6B). *mig-17(E303A)* point mutation or *mig-17::mNeonGreen*  
246 knock-in animals were generated by microinjection of 50 ng/ $\mu$ l Cas9-sgRNA  
247 plasmids, 20ng/ $\mu$ l repair template, and 5ng/ $\mu$ l *Pmyo-3::mCherry* as a co-

248 injection marker. The engineered strains were screened by PCR and verified  
249 by Sanger sequencing.

250

### 251 **Protein extraction, digestion, and labeling**

252 The samples were lysed in buffer (8 M guanidine hydrochloride, 100 mM TEAB)  
253 and sonicated. Samples were then centrifuged at 20,000g for 30 min at 4°C,  
254 and the supernatant collected. Proteins were submitted to reduction by  
255 incubation with 10 mM DTT at 37 °C for 45 min, followed by alkylation using  
256 100 mM acrylamide for 1 h at room temperature and digestion with Lys-C and  
257 trypsin using the FASP method (Wisniewski et al., 2009). After stable isotope  
258 dimethyl labeling in 100 mM TEAB, peptides were mixed with light, intermediate  
259 and heavy (formaldehyde and NaBH<sub>3</sub>CN) isotopic reagents (1:1:1),  
260 respectively (Boersema et al., 2009). The peptide mixtures were desalted on a  
261 Poros R3 microcolumn according to the previous method (Huang et al., 2018).

262

### 263 **Liquid chromatography–tandem mass spectrometry (LC-MS/MS)**

264 LC-ESI-MS/MS analyses were performed using an LTQ Orbitrap Elite mass  
265 spectrometer (Thermo Fisher Scientific, Bremen, Germany) coupled with a  
266 nanoflow EASY-nLC 1000 system (Thermo Fisher Scientific, Odense,  
267 Denmark). A two-column system was adopted for proteomic analysis. The  
268 mobile phases were in Solvent A (0.1% formic acid in H<sub>2</sub>O) and Solvent B (0.1%  
269 formic acid in ACN). The derivatized peptides were eluted using the following  
270 gradients: 2-5% B in 2 min, 5-28% B in 98 min, 28-35% B in 5 min, 35-90% B  
271 in 2 min, 90% B for 13 min at a flow rate of 200 nl/min. Data-dependent analyses  
272 were used in MS analyses. The top 15 abundant ions in each MS scan were  
273 selected and fragmented in HCD mode.

274 Raw data was processed by Proteome Discover (Version 1.4, Thermo Fisher  
275 Scientific, Germany) and matched to the *C. elegans* database (20161228,

276 17,392 sequences) through the Mascot server (Version 2.3, Matrix Science,  
277 London, UK). Data was searched using the following parameters: 10 ppm mass  
278 tolerance for MS and 0.05 Da for MS/MS fragment ions; up to two missed  
279 cleavage sites were allowed; carbamidomethylation on cysteine, dimethyl  
280 labeling as fixed modifications; oxidation on methionine as variable  
281 modifications. The incorporated Target Decoy PSM Validator in Proteome  
282 Discoverer was used to validate the search results with only the hits with  $FDR \leq$   
283 0.01.

284

### 285 **Microscopy and image analyses**

286 Animals were anaesthetized with 50mM Muscimol (Tocris) on 2% agarose pads  
287 (Biowest, Lot No.: 111860), and examined with either with Perkin Elmer or  
288 Andor Dragonfly Spinning-Disk Confocal Microscope Systems. Image  
289 processing was performed by using Image J, Adobe Photoshop CS6 or Imaris  
290 software (Andor).

291

### 292 **Quantification**

293 To quantify the percentage of animals with ectopic pre-synapses of AIY Zone  
294 1 and posterior extension of glia, animals were synchronized by being selected  
295 at larva stage 4 (L4), and then examined 24 hours later using a Nikon Ni-U  
296 fluorescent microscope. Each dataset was collected from at least three  
297 biological replicates. At least 20 animals were scored for each group. For each  
298 germline transformation, multiple transgenic lines were examined. For synaptic  
299 allometric quantification, the ectopic synapses were defined as the presence of  
300 synaptic fluorescent markers the AIY Zone 1 region, an asynaptic area in wild  
301 type AIY neurons (Colon-Ramos et al., 2007; Shao et al., 2013). We also  
302 quantified the ratio of ventral length to total synaptic length (Shao et al. 2013).  
303 The overlap of VCSC glia and ectopic synapses was defined as the VCSC glia

304 and synaptic area of overlap at the Zone 1 and Zone 2 regions. The length of  
305 VCSC glial cilia and ventral process (a and b in Figure 2A) were measured from  
306 confocal images taken in synchronized one-day old adults. The length of the  
307 pharynx and the body length were measured via DIC microscopy performed in  
308 synchronized one-day old adults.

309 Fluorescent intensity of MIG-17::mNeonGreen and EMB-9::mCherry was  
310 quantified with Image J from confocal images at the specified developmental  
311 stages.

312

### 313 **Statistical analysis**

314 Specified statistical analyses were based on student's T-test and performed  
315 with Prism 6. For comparisons of mean fluorescence intensities, ectopic  
316 synapse ratio, length or length ratio, we used an unpaired two-tailed Student's  
317 t test.

318

319 **RESULTS**

320 ***ola226* suppresses defects of *cima-1* (*wy84*) synaptic allometry**

321 The AIY interneurons are a pair of bilaterally symmetric neurons in the  
322 *C. elegans* brain (nerve ring). AIYs display a stereotyped and specific pattern  
323 of presynaptic specializations (White et al., 1986; Colon-Ramos et al., 2007).  
324 This pattern is established during embryogenesis and, although the animals  
325 grow an order of magnitude in length from early embryogenesis to adulthood  
326 (from ~100  $\mu$ m to ~1mm) (Knight et al., 2002; Shibata et al., 2016), the AIY  
327 synaptic pattern is maintained during growth (Figure 1A-1B, 1E,-1E''' and (Shao  
328 et al., 2013)). We term this process of correct maintenance of synaptic positions  
329 during growth "synaptic allometry".

330 From forward genetic screens we had identified *cima-1*, a gene required  
331 for synaptic allometry (Shao et al., 2013). In *cima-1* mutants, the AIY synaptic  
332 pattern develops correctly. However, as animals grow, ectopic synapses  
333 emerge in the Zone 1 region, a region of the AIY neuron which is normally  
334 asynaptic (Figure 1C, 1F-1F''' and (Shao et al., 2013)). *cima-1* encodes a solute  
335 carrier transporter which does not function in neurons, but is rather required in  
336 epidermal cells to antagonize the FGF receptor and likely modulate epidermal-  
337 glia adhesion ((Shao et al., 2013) and Figure S1 for model). In *cima-1* mutants,  
338 crosstalk between the epidermal cell and the neighboring ventral cephalic  
339 sheath cell glia (VCSC glia) is affected, resulting in defects in VCSC glia  
340 position during growth. Abnormal VCSC glia ectopically ensheath the normally  
341 asynaptic Zone 1 region of AIY, resulting in ectopic synapses in Zone 1 (Figure  
342 S1). To identify molecules which cooperate with *cima-1* in regulating synaptic  
343 allometry, we performed an unbiased EMS screen in *cima-1*(*wy84*) mutants for  
344 suppressors of ectopic synapses, and isolated allele *ola226*.

345 Although the animal morphology and the guidance of AIY neurites are  
346 largely unaffected in *cima-1*(*wy84*);*ola226* double mutants (Figure S2 and data  
347 not shown), the newly isolated *ola226* allele robustly suppresses the ectopic

348 presynaptic structures of AIY Zone 1 observed in *cima-1(wy84)* mutants (93.9%  
349 of animals displayed ectopic synapses in *cima-1(wy84)* vs 54.6% in *cima-1(wy84);ola226*  
350 double mutants,  $p < 0.0001$ , Figure 1D, 1G-1I). Suppression  
351 was observed both for the vesicular marker RAB-3 and for the active zone  
352 marker SYD-1 (Figure 1E', 1F', 1G'), suggesting that the *ola226* allele  
353 suppresses ectopic assembly of presynaptic structures, and not just  
354 relocalization of synaptic vesicles. Moreover, young *cima-1(wy84);ola226*  
355 animals display a wild type pattern of presynaptic specializations (Figure 1D),  
356 suggesting that the *ola226* allele does not generally affect synaptogenesis.  
357 Instead, these results suggest that *ola226* is specifically required for the  
358 suppression of ectopic presynaptic specializations resulting from *cima-1*  
359 induced defects in synaptic allometry.

360         Synaptic allometry is regulated by growth, and the penetrance of the  
361 *cima-1* phenotype is affected by the size of the animal (Shao et al., 2013). For  
362 example, dumpy (*dpy*) mutants, which are about 25% shorter than wild type  
363 animals, suppress synaptic allometry defects in *cima-1* mutants (Figure S2A,  
364 S2B, S2D-S2E, S2D'-S2E' and (Shao et al., 2013)). Conversely, long (*lon*)  
365 mutants, which are up to 30% longer than wild type (Brenner, 1974; Morita et  
366 al., 2002; Nystrom et al., 2002; Suzuki et al., 2002), enhance the *cima-1* mutant  
367 phenotype (Figure S2C, S2F-S2F' and (Shao et al., 2013)). To determine if  
368 *ola226* affects synaptic allometry by regulating body size, we examined animal  
369 size in *ola226* single or *cima-1(wy84);ola226* double mutants. We determined  
370 that the length of either *ola226* single or *cima-1(wy84);ola226* double mutants  
371 is similar to that of wild type or *cima-1(wy84)* mutant animals (Figure S2I).  
372 Therefore, the suppression of the AIY ectopic synaptic positions by *ola226*  
373 (Figure S2G-S2H') is not due to an effect of *ola226* on the size of the animal.

374 Together, our findings indicate that *ola226* represents a genetic lesion  
375 required for the emergence of ectopic presynaptic sites during growth in *cima-*  
376 *1* mutants.

377

### 378 **Glia morphology is affected in *ola226* mutants**

379 *Cima-1* affects synaptic allometry by repositioning ventral cephalic  
380 sheath cell (VCSC) glia during growth (Shao et al., 2013). To test if *ola226* also  
381 affects VCSC glia position, we labeled the VCSC glia with mCherry in wild type  
382 and indicated mutants, and quantified VCSC glia position and morphology  
383 (Figure 2A). Consistent and extending our previous observations, we  
384 determined that the VCSC glia defects in *cima-1(wy84)* mutants result from  
385 defects in both position and morphology of the VCSC glia during growth. As  
386 *cima-1* mutant animals grow, VCSC glia cell bodies are posteriorly displaced,  
387 resulting in longer VCSC glia anterior processes (length of the VCSC glia  
388 anterior process: 113.35 $\mu$ m in wild type, 127.53 $\mu$ m in *cima-1(wy84)* mutants,  
389  $p < 0.0001$ . Figure 2B, 2C, 2F). VCSC glia morphology is also altered in *cima-1*  
390 mutants, with endfeet abnormally extending posteriorly (length of VCSC glia  
391 endfeet: 45.52 $\mu$ m in wild type and 51.47 $\mu$ m in *cima-1(wy84)* mutants,  
392  $p < 0.0001$ . Figure 2B-2C, 2G). These two defects change the relative positions  
393 of VCSC glia and the AIY neurite, resulting in ectopic contact of the VCSC glia  
394 with the asynaptic Zone 1 region, and concomitant emergence of ectopic  
395 presynaptic sites in Zone 1 (Figure 2B'-C', 2H). Ablation of VCSC glia suppress  
396 the ectopic synaptic phenotype in Zone 1 (Shao et al, 2013), indicating the  
397 importance of glia in the emergence of these ectopic synapses.

398 In *cima-1(wy84);ola226* double mutants, VCSC glia cell body position  
399 and endfeet morphology phenotypes are suppressed (length of glia anterior  
400 process: 127.53 $\mu$ m in *cima-1(wy84)* and 120.68 $\mu$ m in *cima-1(wy84);ola226*,  
401  $p < 0.0001$ ; length of VCSC glia endfeet: 51.47 $\mu$ m in *cima-1(wy84)* and 45.19 $\mu$ m

402 in *cima-1(wy84);ola226*,  $p < 0.0001$ . Figure 2C, 2D, 2F, 2G). This suppression,  
403 in turn, results in *cima-1(wy84);ola226* double mutants having a reduced region  
404 of contact between the AIY neurons and VCSC glia (88.70% in *cima-1(wy84)*  
405 and 33.67% in *cima-1(wy84);ola226*,  $p < 0.0001$ . Figure 2H). Consequently,  
406 ectopic presynaptic specializations in AIY Zone 1 are suppressed (Figure 2D').  
407 Our findings suggest that *ola226* is a genetic lesion that suppresses *cima-1*  
408 ectopic synapses by reverting the *cima-1* phenotypes on glia position and  
409 morphology.

410 To better understand the phenotype from allele *ola226*, we outcrossed  
411 *cima-1* and examined the VCSC glia and the AIY synaptic phenotypes for just  
412 the *ola226* allele. We determined that animals carrying the *ola226* allele do not  
413 display defects in the position of the VCSC glia (length of glia anterior process:  
414 113.35 $\mu$ m in wild type and 113.68 $\mu$ m in *ola226*,  $p = 0.72$ . Figures 2E and 2F).  
415 However, *ola226* mutants do display a modest but significant defect in the  
416 VCSC glia morphology, with posterior end-feet being shorter in *ola226* as  
417 compared to wild type animals (length of glia end-feet: 45.52 $\mu$ m in wild type,  
418 39.79 $\mu$ m in *ola226*  $p < 0.0001$ . Figure 2G). *ola226* mutants also display a  
419 concomitant defect in the position of AIY, with both the neurite and the soma  
420 being anteriorly displaced as compared to wild type animals (Figure S3).  
421 Interestingly, while *ola226* mutants have phenotypes for both glia morphology  
422 and AIY neurite position, the area of overlap between the glia and AIY is not  
423 affected, nor is the distribution of presynaptic specializations as compared to  
424 wild type (Figure 2E' and 2H). These phenotypes demonstrate that it is not just  
425 glia morphology, glia position or even the position of the AIY neurite in the  
426 animal that regulates synaptic allometry, but rather the relative position  
427 between the VCSC glia and the AIY neurons which determines synaptic  
428 positions during growth. Our findings indicate that both *cima-1* and our newly  
429 identified *ola226* allele affect relative positions of glia and the AIY interneurons



430 during post-embryonic growth, and therefore, affect synaptic allometry by  
431 altering the areas of overlap between these two cells. Together our data  
432 indicate that allele *ola226* is required for normal VCSC glial morphology, and  
433 that it affects synapses by acting in opposition to *cima-1*, thereby reverting the  
434 defective interaction between glia and AIY interneurons observed for *cima-1*  
435 mutants.

436

437 ***ola226* is a lesion in *mig-17*, a gene that encodes an ADAMTS**  
438 **metalloprotease**

439 To identify which gene is affected in the *ola226* allele, we performed SNP  
440 mapping, whole genome sequencing and transgenic rescue experiments. The  
441 *ola226* allele results from a G to A mutation at the end of first exon of the *mig-*  
442 *17* gene, and alters a conserved glutamic acid residue at position 19 to a lysine  
443 (Figure 3A). To then test if *ola226* is a loss-of-function allele of *mig-17*, we  
444 examined two additional loss-of-function *mig-17* alleles, *mig-17(k113)* and *mig-*  
445 *17(k174)* (Nishiwaki, 1999;Nishiwaki et al., 2000). *mig-17(k113)* is a point  
446 mutation in the first intron of the gene and is predicted to affect correct splicing,  
447 while *mig-17(k174)* allele results from a change in Q111 to a premature stop  
448 codon, resulting a putative null allele (Figure 3A) (Shibata et al., 2016). We  
449 found that both *mig-17(k113)* and *mig-17(k174)* mutants suppress the ectopic  
450 synapses in *cima-1(wy84)* mutants (91.9% of animals display ectopic synapses  
451 in *cima-1(wy84)*, 62.3% in *cima-1(wy84);mig-17(k113)*, 29.9% in *cima-*  
452 *1(wy84);mig-17(k174)* and 45.7% in *cima-1(wy84);mig-17(ola226)*,  $p < 0.0001$   
453 for all double mutants as compared to *cima-1(wy84)*; Figures 3B-3F, 3I).  
454 Importantly, introducing a wild type copy of *mig-17* genomic sequence results  
455 in robust rescue of the *ola226* phenotype in the *cima-1(wy84);mig-17(ola226)*  
456 double mutants (45.70% of animals display ectopic synapses in *cima-1(wy84);*  
457 *mig-17(ola226)* and 78.04% in *cima-1(wy84);mig-17(ola226);Pmig-17::mig-*

458 *17*(genomic),  $p < 0.0001$ ; Figures 3G and 3I). Together our findings indicate that  
459 *ola226* is a recessive loss-of-function allele of *mig-17* which suppresses *cima-*  
460 *1(wy84)* defects in synaptic allometry.

461 To further explore how *mig-17* regulates synaptic distribution, we  
462 examined the AIY synaptic phenotype in the loss-of-function mutants *mig-*  
463 *17(ola226)* and *mig-17(k113)*, and also over-expressed a genomic construct of  
464 *mig-17* in wild type animals (*mig-17(OE)*). We found that *mig-17(k113)* loss-of-  
465 function allele displays a normal synaptic distribution in AIY, similar to what we  
466 had observed for the *mig-17(ola226)* allele (Figures S4A-S4D). We also  
467 observed that over-expressing *mig-17* in wild type animals (*mig-17(OE)*)  
468 resulted in ectopic synapses in the Zone 1 region of AIY (Figure 3H and 3I).  
469 These data are consistent with our studies using the *mig-17(ola226)* allele,  
470 which demonstrate that *mig-17* does not affect AIY synaptic distribution on its  
471 own because it does not alter the AIY:VCSC relationship (Figure 2). The data  
472 also demonstrate that overexpression of *mig-17* phenocopies *cima-1(wy84)*  
473 loss-of-function allele, in support of our model that the *mig-17* acts in opposition  
474 to *cima-1*.

475 MIG-17 is best known for its post-embryonic roles in regulating distal tip  
476 cell migration during gonad development (Nishiwaki, 1999), and pharyngeal  
477 size and shape during growth (Shibata et al., 2016). Since AIY is present near  
478 the *C. elegans* pharynx, we tested if the synaptic positions of AIY are related to  
479 pharyngeal length. We found that the length of the pharynx slightly increases in  
480 *cima-1(wy84)* mutants as compared to wild type, and that the increase in  
481 pharynx length is more robust for *mig-17(ola226)* mutants (pharynx length is  
482  $146.6\mu\text{m}$  in wild type,  $150.6\mu\text{m}$  in *cima-1(wy84)* and  $157.9\mu\text{m}$  in *mig-17(ola226)*  
483 animals,  $p < 0.0001$  between wild type and *cima-1(wy84)* and *mig-17(ola226)*  
484 mutant animals; Figure S5). We also observed the *cima-1(wy84);mig-*  
485 *17(ola226)* double mutants enhance the *cima-1* pharynx length phenotype

486 (pharynx length is 160.8 $\mu$ m for *cima-1(wy84);mig-17(ola226)* double mutants,  
487  $p < 0.0001$  when compared with *cima-1(wy84)* mutants; Figure S5). Therefore,  
488 while *mig-17* acts in opposition to *cima-1* in synaptic allometry, it enhances  
489 *cima-1* for the pharyngeal length phenotype. Our findings suggest that the  
490 synaptic allometry phenotypes do not simply result from a defect in pharynx  
491 length. Our studies are consistent with previous reports on the role MIG-17 in  
492 pharyngeal length regulation (Shibata et al., 2016) and extend them, now  
493 indicating that MIG-17 is also required for glia morphology and modulation of  
494 synaptic allometry during growth.

495

496 **MIG-17 and EGL-15/FGFR work in the same pathway to promote the**  
497 **formation of ectopic synapses in *cima-1(wy84)***

498 Our previous study showed that CIMA-1 negatively regulates the  
499 Fibroblast Growth Factor Receptor (FGFR) EGL-15(isoform 5A) in the  
500 epidermal cells to position glia and synapses during growth. Consistent with  
501 this interpretation, mutation of *egl-15(5A)* suppressed the ectopic synapses  
502 caused by *cima-1(wy84)*, and overexpression of the EGL-15(5A) ectodomain  
503 in wild type animals phenocopied *cima-1* mutants (Shao et al., 2013). These  
504 genetic findings are also consistent with western-blot data demonstrating  
505 regulation of EGL-15(5A) levels by CIMA-1 (Shao et al, 2013). Together, the  
506 data support a model whereby *cima-1* modulates epidermal-glia cell adhesion  
507 via regulation of EGL-15/FGFR ectodomain which acts, not in its canonical  
508 signaling role, but as an extracellular adhesion factor (Bulow et al., 2004;Shao  
509 et al., 2013).

510 To understand how *mig-17* cross talks with this pathway in the regulation  
511 of synaptic allometry, we examined its genetic relationship to EGL-15/FGFR.  
512 We generated *cima-1(wy84);egl-15(n484)* double mutants and *cima-*  
513 *1(wy84);mig-17(ola226);egl-15(n484)* triple mutants and observed AIY synaptic

514 distribution. We determined that *cima-1(wy84);egl-15(n484)* double mutants,  
515 *cima-1(wy84);mig-17(ola226)* double mutants and *cima-1(wy84);mig-*  
516 *17(ola226);egl-15(n484)* triple mutants similarly suppress *cima-1(wy84)*  
517 phenotypes (Figures 4A-4F). We note that while the observed suppression is  
518 not a complete reversion to wild type phenotypes, it is consistent with the  
519 degree of suppression observed for glia-ablated animals (Shao et al., 2013).  
520 Our findings might indicate a ceiling effect at the level of the contribution of glia  
521 to the synaptic phenotypes, and suggest that other glia-independent  
522 mechanisms also contribute to synaptic allometry through molecular pathways  
523 distinct from those regulated by MIG-17 and EGL-15. Importantly, these data  
524 suggest that *mig-17* and *egl-15* genetically act in the same pathway to promote  
525 the formation of ectopic synapses in *cima-1(wy84)* mutants via regulation of glia  
526 morphology and position.

527         EGL-15(isoform 5A) is required for maintenance of axon positions during  
528 movement and growth (Bulow et al., 2004). The overexpression of EGL-15(5A)  
529 in epidermal cells also promotes VCSC glia end-feet extension and ectopic  
530 synapses in AIY. This result phenocopies *cima-1(wy84)* mutants and is  
531 consistent with *cima-1* acting antagonistically to the EGL-15/FGF Receptor  
532 (Figures 4G-4I and (Shao et. al. 2013)). To further probe the relationship  
533 between EGL-15(5A) and MIG-17, we examined synapses and glia in animals  
534 overexpressing EGL-15(5A). Interestingly, and consistent with MIG-17 and  
535 EGL-15 acting in the same synaptic allometry pathway, we observed that *mig-*  
536 *17(ola226)* suppresses the VCSC glia extension and ectopic synapses in  
537 animals over-expressing EGL-15(5A) (Figure 4I-4L). Together, our genetic  
538 findings indicate that EGL-15(5A) and MIG-17 act in the same pathway to  
539 position glia and regulate synaptic allometry during growth. Our findings also  
540 indicate that MIG-17 is epistatic to EGL-15/FGFR in positioning glia and

541 regulating synaptic allometry, and that the defects observed for EGL-15/FGFR  
542 overexpressing-animals require *mig-17*.

543

#### 544 **MIG-17 is expressed by muscles to regulate synaptic allometry**

545 CIMA-1 and FGFR EGL-15(5A) are expressed by epidermal cells to  
546 position glia and synapses during growth (model in Figure S1 and (Shao et. al.  
547 2013)). To determine where MIG-17 acts, we first analyzed the expression  
548 pattern of *mig-17*. We found that a *mig-17* transcriptional GFP reporter is  
549 robustly expressed by body wall muscles as colabeled by *Pmyo-3::mCherry*  
550 and consistent with previous reports (Nishiwaki et al., 2000) (Figures 5A-5A’’’).  
551 Additionally, we observed that in the head region, the reporter is seen in the  
552 nervous system (Figure 5B-5B’’’). We did not detect expression of MIG-17 in  
553 VCSC glial cells, or in epidermal cells where the MIG-17 genetic interactors  
554 CIMA-1 and FGFR EGL-15(5A) are expressed (Figure 5C-5D’’’).

555 To determine the *mig-17* site of action, we expressed *mig-17* in the two  
556 tissues in which we observed *mig-17* expression: the nervous system (using  
557 the *unc-14* promoter) and the body wall muscles (using the *myo-3* promoter).  
558 We found robust rescue of *cima-1(wy84);mig-17(ola226)* phenotype when *mig-*  
559 *17* was expressed in body wall muscles, but not upon expression in the nervous  
560 system (Figure 5E). Together, our findings indicate that MIG-17 is expressed  
561 by muscle cells to modulate synaptic allometry. Our findings also indicate that  
562 muscle-derived MIG-17 acts in the same pathway as epidermally-expressed  
563 CIMA-1 and FGFR EGL-15(5A) to modulate glia morphology and synaptic  
564 allometry. Our findings suggest that multiple non-neuronal tissues act *in vivo* to  
565 convey growth information to the nervous system, and regulate synaptic  
566 allometry through glia position.

567

#### 568 **MIG-17 localizes to basement membrane**

569 To better understand how MIG-17, expressed by muscles, cooperates  
570 with CIMA-1, expressed by epidermal cells, to regulate synaptic positions in  
571 neurons, we generated a MIG-17::mNeonGreen knock-in allele (via CRISPR-  
572 Cas9 strategies) that allows us to visualize endogenous MIG-17 localization  
573 throughout development (Dickinson et al., 2013)(Figure S6A). Using this MIG-  
574 17::mNeonGreen reporter, we observed that in the head-region, MIG-17  
575 prominently localizes to the extracellular matrix proximal to the pharynx bulb.  
576 Furthermore, MIG-17 protein levels are detectable in larva stage 1 through larva  
577 stage 4, but becomes undetectable upon reaching the adult stage (Figure 6A-  
578 6H). Our findings are consistent with previous studies indicating that MIG-17  
579 accumulates in the extracellular matrix (Ihara and Nishiwaki, 2007;Shibata et  
580 al., 2016) and *in situ* and western blot studies demonstrating accumulation of  
581 the active form of MIG-17 during larva stage 3 (L3) and larva stage 4 (L4), and  
582 downregulation in adults (Ihara and Nishiwaki, 2008).

583 The localization of MIG-17 is reminiscent of that reported for basement  
584 membrane proteins (Ihara et al., 2011). To more carefully determine if the  
585 localization of secreted MIG-17 corresponds to the basement membrane, we  
586 simultaneously examined MIG-17 localization with the basement membrane  
587 protein EMB-9::mCherry (Kramer, 2005). We observed that MIG-17 colocalizes  
588 with EMB-9 at the extracellular space (Figure 6I-6I"). Together, our findings  
589 indicate that MIG-17 is a muscle-derived secreted metalloprotease whose  
590 levels are regulated during development, and that it localizes to the basement  
591 membrane to modulate synaptic allometry during growth.

592

### 593 **The metalloprotease activity of MIG-17 is required to promote the** 594 **formation of ectopic synapses in *cima-1(wy84)* mutant animals**

595 MIG-17 is best known for its role in distal tip cell migration in *C. elegans*  
596 (Nishiwaki, 1999;Jafari et al., 2010;Shibata et al., 2016). This role depends on

597 the remodeling of gonadal basement membrane through MIG-17  
598 metalloprotease enzymatic activity (Nishiwaki et al., 2000). To determine if  
599 MIG-17 metalloprotease enzymatic activity is also required for promoting the  
600 formation of ectopic synapses in *cima-1(wy84)*, we engineered an E303A point  
601 mutation at the metalloprotease catalytic site via CRISPR/cas-9 to generate the  
602 *mig-17(shc8)* allele (Figures 7A and S6B) (Nishiwaki et al., 2000; Dickinson et  
603 al., 2013). We observed that our engineered *mig-17(shc8)* allele behaves like  
604 other loss-of-function alleles of *mig-17*, suppressing the ectopic synapses of  
605 *cima-1(wy84)* mutant animals (91.91% of animals displayed ectopic synapses  
606 in *cima-1(wy84)* vs 57.49% in *cima-1(wy84); mig-17(shc8)*,  $p < 0.0001$ , Figures  
607 7B-7E, 7H). Consistent with this result, we also determined that a transgene  
608 with the E303A (*mig-17(E303A)*) lesion is incapable of rescuing the *mig-17*  
609 suppression in *mig-17(ola226);cima-1(wy84)* mutants (78.04% of animals  
610 displaying ectopic synapses in *cima-1(wy84);mig-17(ola226)* animals rescued  
611 with the wild type genomic fragment of *mig-17* (*tg:Pmig-17::mig-17(genomic)*,  
612 vs 45.78% in *cima-1(wy84);mig-17(ola226)* with the genomic fragment with the  
613 point mutation in the protease active site (*tg:Pmig-17::mig-17(E303A)*,  
614  $p < 0.0001$ ; Figures 7F-7H). Our data are consistent with structure-function  
615 studies of MIG-17 which have underscored the importance of its  
616 metalloprotease domain (Nishiwaki et al., 2000), and indicate that MIG-17  
617 protease activity is also required for promoting AIY ectopic synapse formation  
618 in *cima-1(wy84)* mutants during growth.

619

## 620 **MIG-17 regulates basement membrane proteins to modulate synaptic** 621 **allometry**

622 To determine how the MIG-17 metalloprotease activity might regulate  
623 synaptic allometry, we first examined the proteome through liquid  
624 chromatography–tandem mass spectrometry (LC-MS/MS) analyses in wild

625 type and *mig-17(ola226)* mutant animals. Unbiased comparative LC-MS/MS  
626 analyses had not been performed for *mig-17(ola226)* mutant animals, and our  
627 analyses provided an opportunity to both identify new targets for the MIG-17  
628 metalloprotease, and to characterize the proteome of the basement membrane  
629 in the *mig-17* mutant background.

630 We observed significant and reproducible differences in the proteome of  
631 *mig-17(ola226)* mutants as compared to wild type animals (Table S3).  
632 Consistent with the importance of MIG-17 in the remodeling of the basement  
633 membrane (Kim and Nishiwaki, 2015), we observed significant differences in  
634 the protein levels of basement membrane components for the *mig-17(ola226)*  
635 mutants as compared to wild type. Importantly, a number of basement  
636 membrane components displayed increased protein levels in the *mig-*  
637 *17(ola226)* mutants, including EMB-9/Collagen IV  $\alpha$ 1 chain, LET-2/Collagen IV  
638  $\alpha$ 2 chain, OST-1/Sparc, UNC-52/Perlecan, NID-1/nidogen, EPI-1/laminin-  
639  $\alpha$ , LAM-1/laminin- $\beta$ , and LAM-2/laminin- $\gamma$ , (Figure 8A and Table S3). Together,  
640 our proteomic analyses reveal potential targets of MIG-17, and extends our  
641 understanding of the role for this ADAMTS metalloprotease in regulating  
642 proteins in the basement membrane.

643 To examine how MIG-17 regulates basement membrane proteins to  
644 modulate synaptic allometry, we visualized AIY synaptic phenotypes in mutants  
645 with basement membrane proteins defects. Informed by our proteomic data and  
646 previously reported *mig-17* interactors (Kim and Nishiwaki, 2015), we focused  
647 our genetic studies on EMB-9/Collagen IV  $\alpha$ 1, OST-1/Sparc, UNC-52/Perlecan  
648 and FBL-1/Fibulin.

649 EMB-9 is a conserved type IV collagen  $\alpha$ 1, and a core component of the  
650 basement membrane (Guo et al., 1991; Sibley et al., 1993; Graham et al., 1997).  
651 In neuromuscular junctions, the basement membrane is directly in contact with  
652 the neuron-muscle synapses, and recent studies identified roles for EMB-9 in



653 post-embryonic neuromuscular junction morphology (Kurshan et al., 2014;Qin  
654 et al., 2014). However, unlike neuromuscular junctions, the AIY synapses are  
655 not directly in contact with the basement membrane (BM) (White et al., 1986).  
656 The lack of direct contact between the AIY synapses and the BM is similar to  
657 most neuron-neuron synapses in the *C. elegans* brain (Kramer, 2005;Hall,  
658 2008), and neuron-neuron synapses in the central nervous system (CNS) of  
659 *Drosophila* and vertebrates (Stork et al., 2008;Krishnaswamy et al., 2019).

660 To examine if EMB-9 affects synapses in AIY, we visualized AIY  
661 synapses in *emb-9* mutant alleles. EMB-9 null alleles are embryonic lethal (Guo  
662 et al., 1991;Gupta et al., 1997), so we used neomorphic missense alleles which  
663 are predicted to result in overabundant or disorganized collagen (Kubota et al.,  
664 2012;Kurshan et al., 2014;Qin et al., 2014;Gotenstein et al., 2018). We  
665 observed that *emb-9(xd51)* mutants, which display defects in neuromuscular  
666 junction synapses (Qin et al., 2014), do not display detectable defects in AIY  
667 synapse distribution (Figure S7). However, we did observe that *emb-9(xd51)*  
668 and *emb-9(tk75)* alleles significantly suppress the ectopic synapses in *cima-*  
669 *1(wy84)* mutant animals (Figure 8B). These genetic findings are consistent with  
670 the proteomic analyses results for EMB-9, and suggest a genetic interaction  
671 between the basement membrane and the CIMA-1 and MIG-17 pathway in  
672 regulating synaptic allometry. Our findings also indicate that the genetic  
673 requirement of basement membrane proteins for synaptic allometry in the AIY  
674 interneurons is distinct from the genetic requirement in the maintenance of NMJ  
675 morphology.

676 To further test the relationship between these genes in synaptic  
677 allometry, we generated *cima-1(wy84);mig-17(ola226);emb-9(tk75)* triple  
678 mutants. We observed that *emb-9(tk75);cima-1(wy84);mig-17(ola226)* did not  
679 display enhanced synaptic defects as compared to *cima-1(wy84);mig-*  
680 *17(ola226)* double mutants (Figure 8B). Our genetic and proteomic findings

681 support a model whereby MIG-17 regulates basement membrane proteins,  
682 such as EMB-9, to modulate synaptic allometry. The absence of MIG-17, or the  
683 presence of neomorphic alleles of EMB-9, result in overabundant or  
684 disorganized EMB-9/Collagen IV that suppress CIMA-1, presumably by  
685 modulating the material properties of the basement membrane during growth.  
686

### 687 **MIG-17 regulates EMB-9/Collagen IV $\alpha$ 1 during post-embryonic growth**

688 To better understand the relationship between MIG-17 and EMB-9 in  
689 regulating synaptic allometry, we examined EMB-9 protein levels by using an  
690 EMB-9::mCherry translational reporter *in vivo* (Ihara et al., 2011). We observed  
691 that like MIG-17, EMB-9 protein levels are regulated during development  
692 (Figure S8). However, unlike MIG-17, whose protein levels decrease as  
693 animals reach the adult stage, EMB-9 protein levels increase as animals  
694 progress through the larval stages, achieving maximal expression in the adult  
695 stage (Figure S8). Additionally, we observed that in *mig-17(ola226)* mutant  
696 animals, EMB-9::mCherry levels were upregulated as compared to wild type  
697 (Figures 8C, 8E, 8G). These data are consistent with our genetic and proteomic  
698 results, and support the hypothesis that in *mig-17(ola226)* mutants, *cima-*  
699 *1(wy84)* synaptic allometry defects are suppressed due to an upregulation of  
700 type IV Collagen protein EMB-9. Moreover while *cima-1* does not affect EMB-  
701 9::mCherry levels on its own, we observed that *cima-1* suppresses the effect of  
702 *mig-17(ola226)* on EMB-9::mCherry protein levels (Figures 8D, 8F-8G). Our  
703 findings support a model in which MIG-17 and CIMA-1 act antagonistically to  
704 each other to modulate synaptic allometry in part by regulating basement  
705 membrane protein EMB-9 during post-embryonic growth.

706 Next, we examined if molecules known to modulate the levels or  
707 conformation of EMB-9 would similarly affect synaptic allometry. To test this,  
708 we imaged the AIY synapses in alleles of *ost-1//Sparc*, *unc-52/Perlecan* and

709 *fbl-1*/Fibulin, all involved in regulating the trafficking or function of EMB-9  
710 (Kubota et al., 2012;Qin et al., 2014;Morrissey et al., 2016). Loss-of function  
711 alleles *ost-1(gk786697, gk193465)*, and *unc-52(gk3)* did not affect the synaptic  
712 phenotypes in AIY neurons (Figure S7). However, and consistent with our  
713 model, all the alleles predicted to result in overabundant or disorganized EMB-  
714 9/Collagen IV significantly suppress the ectopic synapses observed in *cima-*  
715 *1(wy84)* mutants (Figure 8H). Moreover, the gain-of function *fbl-1(k201)* allele  
716 (Kubota et al., 2004), which is predicted to result in overabundant EMB-9  
717 (Kubota et al., 2012), similarly suppresses the ectopic synapses observed in  
718 *cima-1(wy84)* mutants (Figure 8H). These genetic findings are consistent with  
719 our model that basement membrane proteins modulate *cima-1* regulated  
720 synaptic allometry.

721 The *fbl-1(k201)* allele has been previously reported to also modulate the  
722 basement membrane and suppress *mig-17* phenotypes in gonad development  
723 (Kubota et al., 2004). Therefore, we tested the interaction between *mig-*  
724 *17(ola226)* and *fbl-1(k201)* in the *cima-1(wy84)* mutant background. We found  
725 that the AIY synaptic phenotype in *cima-1(wy84);mig-17(ola226);fbl-1(k201)*  
726 triple mutants is similar to that observed in *cima-1(wy84);mig-17(ola226)* or  
727 *cima-1(wy84);fbl-1(k201)*, indicating that both *fbl-1(k201)* and *mig-17(ola226)*  
728 act antagonically to *cima-1* and in the same pathway in the regulation of  
729 synaptic allometry (Figure 8H). Our data are consistent with our model that  
730 genetic perturbations which result in overabundant or disorganized EMB-9  
731 suppress *cima-1* allometry defects. We note however that our genetic findings  
732 are distinct from those reported for gonad development, and suggest that gonad  
733 development and synaptic allometry might have different genetic requirements  
734 regarding these alleles and their effects on the basement membrane. Together,  
735 our findings support the model that MIG-17 regulates synaptic allometry by  
736 modulating basement membrane proteins like EMB-9.

737

738 **The VCSC glia bridge epidermal-derived growth signals with the muscle-**  
739 **secreted basement membrane to maintain synaptic allometry**

740 Our genetic, proteomic and cell biological findings strongly indicate that  
741 *in vivo*, non-neuronal tissues, including epidermal cells, muscle-derived  
742 basement membrane and glia, convey growth information to the nervous  
743 system to regulate synaptic allometry. To understand how this cross-tissue  
744 communication affects glia to regulate synaptic allometry, we examined  
745 electron micrographs that show the relationship between the synapses in AIY  
746 interneurons, the VCSC glia, the epidermal cells, the basement membrane and  
747 the muscles.

748 The AIY Zone 2 synaptic region lies in the ventral base of the nerve ring  
749 bundle and is in direct contact with the basal side of the VCSC glia (White et  
750 al., 1986; Altun, 2019). No basement membrane is present between the VCSC  
751 glia and the nerve ring neurons (Figures 9A-9B). On their apical side, the VCSC  
752 glia contact two distinct non-neuronal tissues: epidermal cells and muscle-  
753 derived basement membrane. VCSC are observed to directly contact epidermal  
754 cells, a cell-cell adhesion relationship which we had previously shown is  
755 regulated by epidermally-expressed CIMA-1 and the ecto-domain of EGL-  
756 15/FGF Receptor (Shao et al., 2013). No basement membrane is present  
757 between the VCSC glia and the epidermal cells. However, at regions where the  
758 glia are apposed to muscle cells, we observed VCSC glia decorated with  
759 basement membrane on the apical side that faces the pseudocoelom, a cavity  
760 that contains internal fluids. VCSC glia therefore have three surface regions:  
761 direct contact, through the basal side, with neurons, direct contact, through the  
762 apical side, with the epidermal cells, and contact with muscle-derived basement  
763 membrane (Figure 9A').

764           Given the anatomical relationship between these tissues, we  
765 hypothesized that if our model were correct, release of muscle-derived *mig-17*  
766 into the pseudocoelom would be sufficient to rescue the AIY synaptic  
767 phenotype in *mig-17* mutants. We decided to ectopically express MIG-17 from  
768 the epidermal cell or VCSC glia and examine *mig-17* rescue. Both epidermal  
769 cells and glia in this region face the pseudocoelom cavity proximal to the  
770 basement membrane. Consistent with our model, we observed that expressing  
771 *mig-17* in the epidermal cells (via the *dpy-7* promoter) or in VCSC glia (via the  
772 *hlh-17* promoter) rescues the *mig-17* suppression in *cima-1(wy84);mig-*  
773 *17(ola226)* mutants (FigureS9). However, expressing *mig-17* from the neurons  
774 that face the basal side of the VCSC glia, and do not contact the pseudocoelom  
775 or the basement membrane, did not rescue these defects (Figure 5E and S9).  
776 Our data collectively indicate that *mig-17* is secreted into the pseudocoelom by  
777 body wall muscles to modulate the basement membrane. The basement  
778 membrane decorates the basal side of the glia, and with the epidermal cells,  
779 jointly modulate glia morphology and position to regulate synaptic allometry  
780 during growth (Model in Figure 9B).

781 **DISCUSSION**

782           Glia regulate synaptic positions during growth. In *C. elegans*, synaptic  
783 positions of the interneuron AIY are established early in embryogenesis and  
784 maintained during growth to preserve circuit integrity (Shao et al., 2013). Our  
785 studies have determined that glia play critical roles, both during embryonic  
786 development and during post-embryonic growth, in maintaining synaptic  
787 positions. During embryonic development, VCSC glia secrete a chemotrophic  
788 factor (Netrin) to coordinate synaptic specificity between AIY and its post-  
789 synaptic partners at a glia-specified coordinate (Colon-Ramos et al., 2007).  
790 During post-embryonic growth, the same VCSC glia are required for  
791 maintaining synaptic positions, but through distinct, Netrin-independent  
792 signaling pathways (Shao et al., 2013). Our studies reveal two important  
793 features regarding maintenance of synaptic allometry. First, while dependent  
794 on the same guidepost cells, synaptic positions are regulated through distinct  
795 molecular pathways during embryonic development and post-embryonic  
796 allometric growth. Second, our findings underscore the *in vivo* importance of  
797 non-neuronal cells, in particular glia, in determining synaptic position. In support  
798 of this, we observe, through genetic and *in vivo* cell biological studies, that  
799 maintenance of synaptic allometry depends on the relative position of the glia  
800 end-feet with respect to the AIY neurite. Specifically, altering glia positions and  
801 AIY positions only result in synaptic phenotypes if their region of contact  
802 (normally in Zone 2) is altered. Our findings are consistent with vertebrate and  
803 invertebrate studies supporting essential roles for glia in regulating synaptic  
804 assembly and function *in vivo* (Allen and Eroglu, 2017; Van Horn and Ruthazer,  
805 2019), and extend these findings to highlight a role for glia in maintaining  
806 synaptic positions during post-embryonic allometric growth.

807           Glia morphology and positions are actively maintained during growth.  
808 Growth in *C. elegans* is coordinated by epidermal cells and body wall muscles

809 (Chisholm and Hardin, 2005). Epidermal cells express genes that regulate  
810 molting, body morphogenesis and animal size (Chisholm and Hsiao,  
811 2012;Chisholm and Xu, 2012). Body wall muscle contractions regulate  
812 elongation during embryogenesis, and influence epidermal cytoskeletal  
813 remodeling via tension-sensing mechanisms (Williams and Waterston,  
814 1994;Chisholm and Hsiao, 2012;Chisholm and Xu, 2012). While we do not yet  
815 understand how growth is sensed in organisms, our findings uncover a  
816 cooperative signaling pathway that emerge from these two growth-regulating  
817 cell types to position glia during allometry. Our genetic studies indicate that  
818 muscle-derived MIG-17 is epistatic to epidermally-derived CIMA-1 and EGL-15,  
819 indicating a multi-tissue, non-neuronal pathway that converges in transducing  
820 growth information to position glia and regulate synaptic allometry. In this way  
821 our findings uncover a non-cell autonomous, two component system that  
822 cooperates to transduce growth information to the nervous system through glia.

823 ADAMTS protease MIG-17 regulates the basement membrane during  
824 post-embryonic growth to modulate synaptic allometry. In *Drosophila*,  
825 homologous ADAMTS Stl and AdamT-A proteins are required for the  
826 development of the peripheral nervous system and the maintenance of the  
827 central nervous system architecture (Lhamo and Ismat, 2015;Skeath et al.,  
828 2017). In humans, lesions in ADAMTS genes result in biomedically important  
829 defects, including short stature and neuronal developmental disorders, among  
830 other problems (Miguel et al., 2005;Howell et al., 2012;Cheng et al., 2018). In  
831 all organisms, ADAMTS metalloproteases function in the degradation and  
832 remodeling of the extracellular matrix (Krishnaswamy et al., 2019). The  
833 remodeling of the extracellular matrix in *C. elegans* is important during gonad  
834 organogenesis and during pharynx growth, and is mediated in part by the MIG-  
835 17 metalloprotease (Nishiwaki et al., 2000;Kubota et al., 2004;Kubota et al.,  
836 2008;Kim and Nishiwaki, 2015;Shibata et al., 2016). Most of our understanding

837 of extracellular matrix structures, such as the basement membrane, are derived  
838 from studies examining its assembly during embryogenesis. Less is known  
839 about how the basement membrane changes during post-embryonic growth  
840 (Jayadev and Sherwood, 2017). Our proteomic, genetic and cell biological  
841 findings strongly suggest that the basement membrane is a dynamic structure  
842 that remodels in part through the activity of MIG-17 metalloproteases.  
843 Disruption of basement membrane components hypothesized to affect the  
844 biophysical properties of the extracellular matrix result in defective glia positions  
845 during growth, and affect synaptic allometry. Together our findings indicate an  
846 important role for the regulated remodeling of the basement membrane in  
847 orchestrating intercellular interaction when animals expand their volume during  
848 growth.

849 A muscle-epidermal-glia signaling axis, mediated through MIG-17  
850 dependent regulation of the extracellular matrix, is necessary for modulating  
851 glia morphology and synaptic positions. Basement membrane proteins have  
852 been previously shown to regulate neuromuscular junction synapses (Ackley et  
853 al., 2003;Patton, 2003;Kurshan et al., 2014;Qin et al., 2014;Rogers and  
854 Nishimune, 2017). Neuromuscular junctions are in direct contact with the  
855 basement membrane, while the neurons examined in this study, which are in  
856 the nerve ring, are not in direct contact with the basement membrane (White et  
857 al., 1986). We find that for nerve ring synapses, MIG-17 regulation of the  
858 basement membrane and synaptic allometry is mediated by glia. VCSC glia  
859 ensheath the nerve ring to form a physical barrier between the neuropil and  
860 adjacent tissues, including the pseudocoelom, the basement membrane and  
861 the epidermal cells (Shaham, 2015). At the basal side VCSC glia contact  
862 neurons in the nerve ring, while at the apical side VCSC glia are either  
863 decorated by basement membrane or in direct contact with epidermal cells. The  
864 relationship of the VCSC glia, basement membrane and epidermal cells reflect



865 the genetic relationship uncovered in our forward genetic screens, with  
866 epidermal CIMA-1 and EGL-15/FGFR modulating glia morphology through  
867 epidermal-glia adhesion, and muscle-derived MIG-17 modulating glia  
868 morphology through the extracellular matrix.

869 The muscle-epidermal-glia signaling axis we uncover here is reminiscent  
870 of the neurovascular unit of the blood brain barrier of *Drosophila* and  
871 vertebrates. In the vertebrate neurovascular unit, muscle-related pericyte cells  
872 interact with vascular endothelial cells and astrocytes through the basement  
873 membrane (Xu et al., 2019). Pericytes, endothelial cells and basement  
874 membrane are not in direct contact with neurons. Instead, astrocytes mediate  
875 signaling between these non-neuronal cells and neurons, including the coupling  
876 of developmental programs that coordinate vasculature development and  
877 neurodevelopment (Tam and Watts, 2010), and the coupling of functional  
878 programs that coordinate neuronal activity with blood flow (Allan, 2006; Koehler  
879 et al., 2009). We note that the extracellular matrix of the blood brain barrier is  
880 molecularly similar to that of the basement membrane of *C. elegans*, and  
881 includes molecules tested in this study such as laminin, collagen IV and fibulin  
882 (Thomsen et al., 2017). While the role of these components in synaptic  
883 allometry has not been examined in vertebrates, it is intriguing to speculate that  
884 the functional neurovascular unit might help transduce information from the  
885 vasculature to mediate synaptic positions during allometric growth. We also  
886 hypothesize that analogous structures to the neurovascular unit might  
887 represent conserved signaling axis that couple glia-mediated communication  
888 between non-neuronal cells and neurons in metazoans.

889

## 890 **ACKNOWLEDGEMENTS**

891 We thank Z.F. Altun and D.H. Hall from WormAtlas for help with schematic  
892 figures. We also thank Shiqing Cai, Yidong Shen, Kiyoji Nishiwaki, Mei Ding

893 (Chinese Academy of Sciences), David Sherwood (Duke University) and the  
894 Caenorhabditis Genetic Center (funded by NIH (P40 OD010440) for providing  
895 strains and plasmids. We thank members in Shao lab and the Colón-Ramos  
896 lab for insightful discussions on the work and advice on the project. We thank  
897 Mi Zhou for providing technical support on image acquisition. We thank the  
898 Research Center for Minority Institutions program, the Marine Biological  
899 Laboratories (MBL), and the Instituto de Neurobiología de la Universidad de  
900 Puerto Rico for providing meeting and brainstorming platforms. Research in the  
901 Z.S. lab was supported by the National Natural Science Foundation of China  
902 (31471026, 31872762), Shanghai Municipal Science and Technology Major  
903 Project (No. 2018SHZDZX01) and ZJLab. Research in the DAC-R lab was  
904 supported by NIH R01NS076558, DP1NS111778 and by an HHMI Scholar  
905 Award.

906

907

#### **AUTHORS' CONTRIBUTION**

908 TJ, KW, JH, MW, XZ, ZS and DAC-R designed experiments. TJ, KW, LF, JH,  
909 MW, HD, JS, MW and ZS performed experiments. TJ, KW, LF, JH, MW, XZ,  
910 LAM,ZS and DAC-R analyzed and interpreted the data. TJ, ZS and DAC-R  
911 wrote the paper.

912

913 **Figure 1. *ola226* suppresses *cima-1* (*wy84*) synaptic allometry defects**

914 **(A)** Cartoon diagram of the distribution of presynaptic sites in the AIY  
915 interneurons of the nematode *C. elegans*. The head of *C. elegans* (solid black  
916 lines), and the pharynx (dashed grey line) are outlined. A single AIY  
917 interneuron is depicted in gray, with an oval representing the cell body and a  
918 solid gray line representing the neurite. Presynaptic puncta are green. The  
919 AIY neurites can be subdivided to three zones: an asynaptic region proximal  
920 to the cell body called Zone 1, a synapse-rich region called Zone 2 (asterisk)

921 and a region with sparse synapses, called Zone 3. The red (b) and blue (a)  
922 dashed lines represent synaptic distribution, and correspond to Zone 2 and 3  
923 (respectively) in wild type animals. The dotted box represents the region of  
924 the head imaged in B-G". **(B-G")** Confocal micrograph images of the AIY  
925 presynaptic sites labeled with the synaptic vesicle marker mCherry::RAB-3  
926 (pseudo-colored green, B-G) and active zone protein GFP::SYD-1 (pseudo-  
927 colored red, E'-G') in larva stage 1 animals (B-D) or adult animals (E-G") for  
928 wild type (B, E, E', E"), *cima-1(wy84)* mutants (C, F, F', F") or *cima-1(wy84);*  
929 *ola226* (D, G, G', G"). Merged images displaying co-localization of synaptic  
930 vesicle marker mCherry::RAB-3 and active zone protein GFP::SYD-1 in (E"-  
931 G"). Schematic diagrams of the observations are depicted in (E'''-G'''). Scale  
932 bars, 10µm. Note that the size of the L1 animal is ~4x smaller than the adult,  
933 but the synaptic pattern is similar. Brackets: Zone 1 region; Asterisk: Zone 2  
934 region; Arrows: ectopic synapses in Zone 1 region. **(H)** Quantification of the  
935 percentage of animals displaying ectopic AIY presynaptic sites in the Zone 1  
936 region for indicated genotypes. **(I)** Quantification of the ratio of ventral  
937 synaptic length (see red (b) in schematic in (A and E'''-G''')) to total synaptic  
938 region (sum of the length of blue (a) and red (b) in schematic in (A and E'''-  
939 G''')). The total number of animals (N) and the number of times scored (n) are  
940 indicated in each bar for each genotype as N/n. Error bars represent SEM.  
941 Statistical analyses are based on two-tailed student's t-test, \*\*\*\* p<0.0001 as  
942 compared to wild type (if on top of bar graph), unless brackets are used  
943 between two compared genotypes.

944

## 945 **Figure 2. Glia morphology is affected in *ola226* mutants**

946 **(A)** Cartoon diagram of the ventral and dorsal cephalic sheath cell glia (red) in  
947 the *C. elegans* head. The ventral cephalic sheath cell (VCSC) glia, which is  
948 the lower one labeled in the schematic, contacts the AIY synapses. **(B-E')**

949 Confocal micrographs of the morphology of VCSC glia and the anterior  
950 process (red, labeled with *Phlh-17::mCherry*, B-E), or of VCSC glia cell body  
951 and endfeet (red) with the AIY presynaptic marker (green, GFP::*RAB-3*, B'-E')  
952 in adult wild type (B, B'), *cima-1(wy84)* mutants (C, C'), *cima-1(wy84);ola226*  
953 mutants (D, D'), and *ola226* mutants (E, E'). Brackets indicate the AIY Zone 1  
954 region, and asterisks mark the AIY Zone 2 region (see Figure 1A). The  
955 animals imaged in B-E are not the same as B'-E'. **(F-H)** Quantification of  
956 phenotypes, including the length of glia anterior process (F, indicated in  
957 schematic A), the length of ventral endfeet (G, indicated in schematic A) and  
958 the percentage of animals displaying overlap between the AIY synapses and  
959 the VCSC glia in Zone 1 (H). The total number of animals (N) and the number  
960 of times scored (n) are indicated in each bar for each genotype as N/n.  
961 Statistical analyses are based on two-tailed student's t-test. Error bars  
962 represent SEM, NS: not significant as compared to wild type, \*\*\*\*p< 0.0001 as  
963 compared to wild type (if on top of bar graph), unless brackets are used  
964 between two compared genotypes.

965

### 966 **Figure 3. *ola226* is a lesion in the *mig-17* gene**

967 **(A)** Schematic diagram of the *mig-17* gene, corresponding protein domains  
968 coded by the exons (colored) and genetic lesions for the alleles used in this  
969 study. **(B-H)** Confocal micrographs of the AIY synaptic vesicle marker  
970 GFP::*RAB-3* (green) in adult wild type (B), *cima-1(wy84)* (C), *cima-*  
971 *1(wy84);mig-17(ola226)* (D), *cima-1(wy84);mig-17(k113)* (E), *cima-*  
972 *1(wy84);mig-17(k174)* (F), *cima-1(wy84);mig-17(ola226)* animals expressing a  
973 wild type copy of the *mig-17* gene (*Pmig-17::mig-17(genomic)*) (G), and wild  
974 type animals over-expressing the *mig-17* gene (*Pmig-17::mig-17(genomic)*)  
975 (H). Brackets indicate the AIY Zone 1 region; asterisks indicate the Zone 2  
976 region. Scale bar in B applies to all images, 10µm. **(I)** Quantification of the

977 percentage of animals with ectopic synapses in the AIY Zone 1 region for  
978 indicated genotypes. The total number of animals (N), the number of times  
979 scored (n1) are indicated in each bar for each genotype, as are, for the  
980 transgenic lines created, the number of transgenic lines (n2) examined (all  
981 using the convention N/n1/n2). Statistical analyses are based on two-tailed  
982 student's t-test. Error bars represent SEM, \*\*p<0.01, \*\*\*\*p< 0.0001 as  
983 compared to *cima-1 (wy84)* (if on top of bar graph), unless brackets are used  
984 between two compared genotypes.

985

986 **Figure 4. MIG-17 genetically interacts with EGL-15/Fibroblast Growth**  
987 **Factor Receptor to regulate synaptic allometry**

988 **(A-E)** Confocal micrographs of the AIY synaptic vesicle marker GFP::RAB-3  
989 (green) in adult wild type (A), *cima-1(wy84)* (B), *cima-1(wy84);egl-15(n484)*  
990 (C), *cima-1(wy84);mig-17(ola226)* (D), *cima-1(wy84);mig-17(ola226);egl-*  
991 *15(n484)* (E) adult animals. In all images (A-E, G-J), brackets indicate the AIY  
992 Zone 1 region, asterisks mark the Zone 2 region and scale bar (in (A)), 10µm.

993 **(F)** Quantification of the percentage of animals with ectopic synapses in the  
994 AIY Zone 1 region for indicated genotypes. **(G-J)** Confocal micrographs of AIY  
995 synaptic vesicle marker GFP::RAB-3 (green) and VCSC glia (red) in adult wild  
996 type (G), *cima-1(wy84)* (H), wild type overexpressing EGL-15(isoform 5A) in  
997 epidermal cells by using *Pdpy-7::egl-15(5A)* (I) and *mig-17(ola226)*  
998 overexpressing EGL-15(isoform 5A) in epidermal cells by using *Pdpy-7::egl-*  
999 *15(5A)* (J). **(K-L)** Quantification of the percentage of animals with ectopic

1000 synapses in the AIY Zone 1 (K) and with distended glia endfeet (L) for  
1001 indicated genotypes. In the graphs, the total number of animals (N), the  
1002 number of times scored (n1) are indicated in each bar for each genotype, as  
1003 are, for the transgenic lines created, the number of transgenic lines (n2)  
1004 examined (all using the convention N/n1/n2). Statistical analyses are based

1005 on two-tailed student's t-test. Error bars represent SEM, NS: not significant,  
1006 \*\* $p < 0.01$ , \*\*\* $p < 0.001$ , \*\*\*\* $p < 0.0001$  as compared to wild type (if on top of bar  
1007 graph), unless brackets are used between two compared genotypes.

1008

1009 **Figure 5. MIG-17 is expressed by body wall muscles to regulate synaptic**  
1010 **allometry**

1011 **(A-D**) Confocal micrographs of adult animals expressing the transcriptional  
1012 reporter *mig-17(genomic)::SL2::GFP* (green) with reporters that co-label body  
1013 wall muscles (*Pmyo-3::mCherry* (A-A')), epidermal cells (*Pdpy-4::mCherry*  
1014 (B-B')), VCSC glia (*Phlh-17::mCherry* (C-C')) and neurons (*Prab-3::mCherry*  
1015 (D-D')). Images (A'-D') correspond to a transverse cross-section of the  
1016 confocal micrographs, specifically for the region corresponding to the dashed  
1017 white line in (A-D). The scale bar (10 $\mu$ m) in A applies to B, C, D, and in A'  
1018 applies all transverse cross-section images. **(E)** Quantification of the  
1019 percentage of adult animals with ectopic synapses in the AIY Zone 1 region of  
1020 the indicated genotypes and rescue experiments. The total number of animals  
1021 (N) and the number of times scored (n1) are indicated in each bar for each  
1022 genotype, as are, for the transgenic lines created, the number of transgenic  
1023 lines (n2) examined (all using the convention N/n1/n2). Statistical analyses  
1024 are based on two-tailed student's t-test. Error bars represent SEM, NS: not  
1025 significant, \*\*\*\* $p < 0.0001$  as compared to the no-transgene control (if on top of  
1026 bar graph), unless brackets are used between two compared genotypes.

1027

1028 **Figure 6. MIG-17 is developmentally regulated and localizes to the**  
1029 **basement membrane**

1030 **(A)** Cartoon diagram of the head of *C. elegans*, similar to Figure 1A. The  
1031 dotted box indicates the region imaged in the subsequent micrographs. **(B-F)**  
1032 Confocal micrographs of animals with a CRISPR-engineered MIG-

1033 17::mNeonGreen, imaged at larva stage 1 (L1 in (B)), larva stage 2 (L2 in  
1034 (C)), larva stage 3 (L3 in (D)), larva stage 4 (L4 in (E)) and 1 day-old adults  
1035 (F). **(G-H)** Quantification of MIG-17::mNeonGreen intensity at different  
1036 developmental stages (G) and the p- value for paired comparison based on  
1037 two-tailed student's t-test (H). In the graph, the total number of animals (N)  
1038 and the number of times scored (n) are indicated in each bar for each  
1039 genotype as N/n. Statistical analyses are based on two-tailed student's t-test.  
1040 Error bars represent SEM. **(I-I')** Confocal micrographs of adult animals  
1041 expressing MIG-17::mNeonGreen (I) and EMB-9::mCherry (I') and merged  
1042 image of both markers. For all images, scale bars are 10 $\mu$ m.

1043

1044 **Figure 7. The metalloprotease activity of MIG-17 is required to suppress**  
1045 **the formation of ectopic synapses in *cima-1(wy84)* mutant animals**

1046 **(A)** Schematic diagram of the MIG-17 protein, corresponding conserved  
1047 protein domains (colored) and genetic lesions for the alleles used in this  
1048 study. **(B-G)** Confocal micrographs of the AIY presynaptic sites labeled with  
1049 the synaptic vesicle marker GFP::RAB-3 (pseudo-colored green) in adult wild  
1050 type (B), *cima-1(wy84)* (C), *cima-1(wy84);mig-17(ola226)* (D), *cima-*  
1051 *1(wy84);mig-17(shc8)* (E), *cima-1(wy84);mig-17(ola226)* animals expressing a  
1052 wild type copy of the *mig-17* genomic DNA (*Pmig-17::mig-17*) (F), and *cima-*  
1053 *1(wy84);mig-17(ola226)* animals expressing a copy of the *mig-17* genomic  
1054 DNA with a point mutation in the metalloprotease domain (*Pmig-17::mig-*  
1055 *17(E303A)*) (G). Brackets indicate the AIY Zone 1 region; asterisks indicate  
1056 the Zone 2 region. The scale bar in B is 10 $\mu$ m and applies to all images. **(H)**  
1057 Quantification of the percentage of animals with ectopic synapses in the AIY  
1058 Zone 1 region in indicated genotypes. In the graph, the transgene rescue with  
1059 wild type copy of the *mig-17* genomic DNA control data is the same as in  
1060 Figure 3I. The total number of animals (N) and the number of times scored

1061 (n1) are indicated in each bar for each genotype, as are, for the transgenic  
1062 lines created, the number of transgenic lines (n2) examined (all using the  
1063 convention N/n1/n2). Statistical analyses are based on two-tailed student's t-  
1064 test. Error bars represent SEM, NS: not significant, \*\*\*\*p< 0.0001 as  
1065 compared to wild type (if on top of bar graph), unless brackets are used  
1066 between two compared genotypes.

1067

1068 **Figure 8. MIG-17 suppresses the synaptic allometry defect in *cima-***  
1069 ***1(wy84)* mutants through modulation of basement membrane proteins**

1070 **(A)** List of basement membrane components upregulated in the mass  
1071 spectrometry analyses (see also Table S3), and alleles tested with *cima-1* for  
1072 their capacity to suppress the synaptic allometry phenotypes in adult worms.

1073 **(B)** Quantification of the percentage of animals with ectopic synapses in the  
1074 Zone 1 region of AIY in the indicated the genotypes. **(C-F)** Confocal  
1075 micrographs of EMB-9::mCherry which allowed examination of EMB-9  
1076 protein levels in the adult head of wild type animals (C), *cima-1(wy84)*  
1077 mutants (D), *mig-17(ola226)* mutants (E), and *cima-1(wy84);mig-17(ola226)*  
1078 double mutants (F). For a developmental characterization of the expression  
1079 of EMB-9 see Figure S8. **(G)** Quantification of EMB-9::mCherry fluorescence  
1080 intensity in the indicated genotypes. **(H)** Quantification of the percentage  
1081 animals with ectopic synapses in the Zone 1 region of AIY in the indicated  
1082 genotypes. In all graphs, the total number of animals (N) and the number of  
1083 times scored (n) are indicated in each bar for each genotype as N/n.

1084 Statistical analyses are based on two-tailed student's t-test. Error bars  
1085 represent SEM, NS: not significant, \*p<0.05, \*\*\*p<0.001, \*\*\*\*p< 0.0001 as  
1086 compared to *cima-1(wy84)* mutants (in B and H) and wild type (in G), unless  
1087 brackets are used between two compared genotypes.

1088



1089 **Figure 9. Glia maintain synaptic allometry by bridging epidermal-derived**  
1090 **growth signals with the muscle-secreted basement membrane**

1091 **(A-A')** Segmented electron micrograph from a wild type animal (JSH236 from  
1092 (White et al., 1986). The EM corresponds to the Zone 2 region of AIY, with  
1093 marked muscles (pseudo-colored green), basement membrane (BM, pseudo-  
1094 colored red), VCSC glia (pseudo-colored teal), epidermal syncytium (pseudo-  
1095 colored beige) and the ventral bundle of the nerve ring (pseudo-colored pink,  
1096 including AIY Zone 2 pseudo-colored dark pink). In (A'), the yellow-boxed  
1097 region is enlarged and the pseudo-coloring opacity is decreased as to show  
1098 that the basement membrane, specifically observed between muscle and  
1099 VCSC glia, but not between glia and epidermal cells or between glia and  
1100 neurons. **(C)** A cartoon diagram depicting the cross section of *C. elegans*  
1101 nerve ring as shown in A (modified from WormAtlas.org). As illustrated in the  
1102 cartoon and the EM image, body wall muscle (green), the nerve ring (pink)  
1103 and glia (teal) are proximal to the epidermal cells (beige). The nerve ring  
1104 bundle is surrounded by VCSC glia, which contact it directly at the glia basal  
1105 side. At the glia apical side, glia interact with muscle-derived basement  
1106 membrane (red) and epidermal cells (beige). To the right of the schematic, a  
1107 molecular and cellular model of our *in vivo* data demonstrating the role of non-  
1108 neuronal cell in glia position and morphology to regulate synaptic allometry  
1109 during growth.

1110

1111 **Figure S1 Model of CIMA-1 site of action**

1112 **(A, C)** Cartoon diagrams of the head of the *C. elegans* of wild type (A) and  
1113 *cima-1* mutant animals (C). In both cartoons, the epidermal syncytium is  
1114 represented in beige, ventral cephalic sheath cell (VCSC) glia in red and the  
1115 AIY interneuron in green. Blue dashed lines indicated sites of epidermal-glia  
1116 contact. The cartoons are graphical abstracts of the findings of (Shao et al.,

1117 2013). In wild type animals, CIMA-1 acts in epidermal cells to suppresses the  
1118 epidermally-derived FGF Receptor/EGL-15, which in turn maintains VCSC  
1119 glia morphology, probably by mediating adhesion between the epidermal cell  
1120 and glia. In *cima-1* loss-of-function mutants (C), EGL-15 protein levels are  
1121 upregulated, and this promotes VCSC glia endfeet extension, allowing ectopic  
1122 contact with the AIY Zone 1 region and promoting formation and stability of  
1123 ectopic synapses in AIY Zone 1. **(B, D)** Confocal micrographs of the VCSC  
1124 glia (red) and the AIY interneurons (green) with bright field in adult wild type  
1125 (B) and *cima-1(wy84)* mutant animals (D) for the region in the dashed box (A  
1126 and C). Brackets indicate AIY Zone 1 region; asterisks indicate Zone 2  
1127 region. Scale bar, 10 $\mu$ m.

1128

1129 **Figure S2. Synaptic allometry is affected by the size of the animal**

1130 **(A-C)** Images of wild type (A), *cima-1(wy84);dpy-4(e1166)* (B) and *cima-*  
1131 *1(wy84);lon-3(e2175)* mutant animals. The dumpy or long mutants are ~25%  
1132 shorter or longer than wild type animals, respectively. **(D-H')** Confocal  
1133 micrographs of the AIY presynaptic sites (visualized with GFP::RAB-3, green)  
1134 in adult wild type (D, D'), *cima-1(wy84);dpy-4(e1166)* (E, E'), *cima-*  
1135 *1(wy84);lon-3(e2175)* (F, F'), *cima-1(wy84)* (G,G') and *cima-1(wy84);ola226*  
1136 (H, H') with bright field (D, E, F, G, H) or without bright field (D', E', F', G', H').  
1137 Brackets indicate the AIY Zone 1 region; asterisks indicate the Zone 2 region.  
1138 Scale bar in A is 200 $\mu$ m and applies to B and C; scale bar in D is 10 $\mu$ m and  
1139 applies to all fluorescent micrographs. **(I)** Quantification of the total animal  
1140 length of wild type, *cima-1(wy84)*, *ola226* and *cima-1(wy84);ola226* mutants.  
1141 In the graph, the total number of animals (N) and the number of times scored  
1142 (n) are indicated in each bar for each genotype as N/n. Error bars represent  
1143 SEM. Statistical analyses are based on two-tailed student's t-test, NS: not  
1144 significant or p>0.05.

1145

1146 **Figure S3. *ola226* affects AIY neurite and cell body position**

1147 **(A)** A cartoon diagram of AIY (red) in the *C. elegans* head. The orange arrow  
1148 indicates the cell body, bracket indicates the Zone 1 region, asterisk indicates  
1149 Zone 2 region, and vertical dashed line indicates center of pharynx bulb here  
1150 and in micrographs B-C. Lengths scored for cell body position (graph in D)  
1151 and Zone 1 length (graph in E) are shown. **(B-C)** Confocal micrographs of AIY  
1152 (red) with bright field microscopy for wild type (B) and *ola226* mutants (C). In  
1153 (B), a co-marker used in the study is also visible proximal to AIY. Importantly  
1154 for the study, while AIYs have the same shape in the inspected genotypes,  
1155 note the differences in the AIY neurite and cell body positions between these  
1156 two genotypes as compared to the pharynx bulb (visible with bright field). **(D-**  
1157 **E)** Quantification of the position of AIY (length between the tip of pharynx and  
1158 the AIY cell body, as indicated in the schematic in (A)) (D), and quantification  
1159 of the length of Zone 1 (E) in wild type and *ola226* mutant animals. In the  
1160 graph, the total number of animals (N) and the number of times scored (n) are  
1161 indicated in each bar for each genotype as N/n. Error bars represent SEM.  
1162 Statistical analyses are based on two-tailed student's t-test, \*\*\*\* p<0.0001.

1163

1164 **Figure S4. Synaptic phenotypes in *mig-17* alleles**

1165 **(A-C)** Confocal micrographs of the AIY synaptic vesicle marker GFP::RAB-3  
1166 (green) in the wild type (A), *mig-17(ola226)* mutant (B) and *mig-17(k113)*  
1167 mutant (C). The scale bar in A is 10µm and applies to all panels. Brackets  
1168 mark the Zone 1 region; asterisks indicate the Zone 2 region. **(D)**  
1169 Quantification of the percentage of adult animals with ectopic synapses in the  
1170 AIY Zone 1 region. In the graph, the total number of animals (N) and the  
1171 number of times scored (n) are indicated in each bar for each genotype as

1172 N/n. Statistical analyses are based on two-tailed student's t-test, Error bars  
1173 represent SEM, NS: not significant or  $p > 0.05$ .

1174

1175 **Figure S5. *mig-17(ola226)* and *cima-1(wy84)* phenotypes in pharyngeal**  
1176 **length**

1177 **(A)** A cartoon diagram of the pharynx in the *C. elegans* head. The pharynx is  
1178 outlined with a dashed grey line, and the length quantified in (B) is shown. **(B)**  
1179 Quantification of pharyngeal length of wild type, *cima-1(wy84)*, *mig-17(ola226)*  
1180 and *cima-1(wy84);mig-17(ola226)* double mutants. The data indicate that both  
1181 *cima-1(wy84)* and *mig-17(ola226)* significantly increase the pharyngeal  
1182 length, consistent with (Shibata et al., 2016), and that the double mutant  
1183 enhances the single mutant effects. The data indicate that unlike the AIY  
1184 presynaptic phenotype, *mig-17(ola226)* and *cima-1(wy84)* cooperate, rather  
1185 than antagonize, each other in regulating pharyngeal length. In the graph, the  
1186 total number of animals (N) and the number of times scored (n) are indicated  
1187 in each bar for each genotype as N/n. Statistical analyses are based on two-  
1188 tailed student's t-test. Error bars represent SEM, \* $p < 0.05$ , \*\*\*\* $p < 0.0001$  as  
1189 compared to wild type or between indicated genotypes.

1190

1191 **Figure S6 CRISPR strategies to generate endogenous MIG-**  
1192 **17::mNeonGreen and the *mig-17(shc8)* allele**

1193 **(A)** Schematic of the strategy used to fuse to the C-terminus of the  
1194 endogenous genomic *mig-17* locus with mNeonGreen (Dickinson et al.,  
1195 2013). Briefly and as indicated, two sgRNAs (blue) were used to insert  
1196 mNeonGreen::3xFlag into the MIG-17 C-terminus via CRISPR. The *mig-17*  
1197 exons are indicated in the schematic by black boxes; the green and purple  
1198 boxes represent mNeonGreen and 3xflag tags. Two synonymous mutations at  
1199 the PAM sites were made on the repair templates (orange) to avoid cutting by

1200 Cas9. **(B)** Schematic of the strategy used to change E303 at MIG-17 and  
1201 generate the *mig-17(shc8)* allele. The location for the two sgRNAs used  
1202 (black bolded and blue) and the *shc8* (E303A) repair template are indicated.  
1203 The repair template comprised of 1.2 kb upstream and 1.2 kb downstream  
1204 genomic sequence flanking the enzymatic active site E303. The Glutamic acid  
1205 (GAA) at the 303 was changed into Alanine (GCA) (red). Eight synonymous  
1206 mutations were made to prevent Cas9 from cutting the repair template  
1207 (orange). sgRNA design is based on sgRNA design tool (<http://crispr.mit.edu>).

1208

### 1209 **Figure S7 Phenotypes of basement membrane genes in AIY synapses**

1210 Quantification of the percentage of adult animals with ectopic synapses in the  
1211 AIY Zone 1 region in *ost-1(gk786697, gk193465)*, *emb-9(xd51)*, *fbl-1(k201)*, or  
1212 *unc-52(gk3)* mutants. In the graph, the total number of animals (N) and the  
1213 number of times scored (n) are indicated in each bar for each genotype as N/n.  
1214 Statistical analyses are based on two-tailed student's t-test, Error bars  
1215 represent SEM, NS: not significant or  $p > 0.05$ .

1216

### 1217 **Figure S8. EMB-9 is developmentally regulated**

1218 **(A)** Cartoon diagram of the head of *C. elegans*, similar to Figure 1A. The  
1219 dotted box indicates the region imaged in the subsequent micrographs. **(B-F)**  
1220 Confocal micrographs of animals expressing EMB-9::mCherry (Ihara et al.,  
1221 2011), imaged at larva stage 1 (L1 in (B)), larva stage 2 (L2 in (C)), larva  
1222 stage 3 (L3 in (D)), larva stage 4 (L4 in (E)) and 1 day-old adults (F). For all  
1223 images, scale bars are 10 $\mu$ m. **(G-H)** Quantification of EMB-9::mCherry  
1224 intensity at different developmental stages (G) and the p- value for paired  
1225 comparison based on two-tailed student's t-test (H). In the graph, the total  
1226 number of animals (N) and the number of times scored (n) are indicated in

1227 each bar for each genotype as N/n. Statistical analyses are based on two-  
1228 tailed student's t-test. Error bars represent SEM.

1229

1230 **Figure S9 Ectopic expression of *mig-17* in epidermal cells or VCSC glia**  
1231 **rescues the *mig-17* suppression in *mig-17(ola226);cima-1(wy84)* mutants**

1232 Quantification of the percentage of adult animals with ectopic synapses in the  
1233 AIY Zone 1 region in the indicated genotypes. The *cima-1(wy84);mig-*  
1234 *17(ola226)* no-transgene control, and the body wall muscle rescue control, are  
1235 the same as in Figure 5E (and were scored at the same time as the  
1236 experimentals shown here). In the graph, the total number of animals (N) and  
1237 the number of times scored (n1) are indicated in each bar for each genotype,  
1238 as are, for the transgenic lines created, the number of transgenic lines (n2)  
1239 examined (all using the convention N/n1/n2). Statistical analyses are based on  
1240 two-tailed student's t-test. Error bars represent SEM, \*\*\*\*p< 0.0001 as  
1241 compared to the no-transgene control.

1242

1243 **Supplemental Table S1. Strains used in this study**

1244 Strains and the corresponding genotypes are listed in the table S1.

1245

1246 **Supplemental Table S2. Constructs used in this study**

1247 The name of constructs, the primers and the vectors for building the constructs  
1248 are listed in the table S2. Detailed cloning information is available upon request.

1249

1250 **Supplemental Table S3. Protein levels altered in *mig-17(ola226)* as**  
1251 **detected by LS/MS proteomic analyses.**

1252 Proteins upregulated (>1.2 fold) or downregulated (<0.8 fold) are listed in the  
1253 spreadsheet. Note that *mig-17(ola226)* was isolated from forward genetic  
1254 screen, which would introduce other background mutations. Further analyses

1255 are required to confirm if the protein level changes are due specifically to the  
1256 *mig-17(ola226)* mutation.

1257

1258

1259

1260

## REFERENCE

- 1261 Ackley, B.D., Kang, S.H., Crew, J.R., Suh, C., Jin, Y., and Kramer, J.M. (2003).  
1262 The basement membrane components nidogen and type XVIII collagen  
1263 regulate organization of neuromuscular junctions in *Caenorhabditis*  
1264 *elegans*. *J Neurosci* 23, 3577-3587.
- 1265 Allan, S. (2006). The neurovascular unit and the key role of astrocytes in the  
1266 regulation of cerebral blood flow. *Cerebrovasc Dis* 21, 137-138.
- 1267 Allen, N.J., and Eroglu, C. (2017). Cell Biology of Astrocyte-Synapse  
1268 Interactions. *Neuron* 96, 697-708.
- 1269 Altun, Z.F.a.H., D.H. (2019). *Handbook of C. elegans Anatomy*.
- 1270 Ango, F., Wu, C., Van Der Want, J.J., Wu, P., Schachner, M., and Huang, Z.J.  
1271 (2008). Bergmann glia and the recognition molecule CHL1 organize  
1272 GABAergic axons and direct innervation of Purkinje cell dendrites. *PLoS*  
1273 *Biol* 6, e103.
- 1274 Aurelio, O., Boulin, T., and Hobert, O. (2003). Identification of spatial and  
1275 temporal cues that regulate postembryonic expression of axon  
1276 maintenance factors in the *C. elegans* ventral nerve cord. *Development*  
1277 130, 599-610.
- 1278 Aurelio, O., Hall, D.H., and Hobert, O. (2002). Immunoglobulin-domain proteins  
1279 required for maintenance of ventral nerve cord organization. *Science*  
1280 295, 686-690.
- 1281 Benard, C., and Hobert, O. (2009). Looking beyond development: maintaining  
1282 nervous system architecture. *Curr Top Dev Biol* 87, 175-194.
- 1283 Benard, C., Tjoe, N., Boulin, T., Recio, J., and Hobert, O. (2009). The small,  
1284 secreted immunoglobulin protein ZIG-3 maintains axon position in  
1285 *Caenorhabditis elegans*. *Genetics* 183, 917-927.
- 1286 Benard, C.Y., Blanchette, C., Recio, J., and Hobert, O. (2012). The secreted  
1287 immunoglobulin domain proteins ZIG-5 and ZIG-8 cooperate with  
1288 L1CAM/SAX-7 to maintain nervous system integrity. *PLoS Genet* 8,  
1289 e1002819.
- 1290 Benard, C.Y., Boyanov, A., Hall, D.H., and Hobert, O. (2006). DIG-1, a novel  
1291 giant protein, non-autonomously mediates maintenance of nervous  
1292 system architecture. *Development* 133, 3329-3340.

- 1293 Binder, M.J., Mccoombe, S., Williams, E.D., Mcculloch, D.R., and Ward, A.C.  
1294 (2017). The extracellular matrix in cancer progression: Role of hyalectan  
1295 proteoglycans and ADAMTS enzymes. *Cancer Lett* 385, 55-64.
- 1296 Boersema, P.J., Raijmakers, R., Lemeer, S., Mohammed, S., and Heck, A.J.  
1297 (2009). Multiplex peptide stable isotope dimethyl labeling for quantitative  
1298 proteomics. *Nat Protoc* 4, 484-494.
- 1299 Brenner, S. (1974). The genetics of *Caenorhabditis elegans*. *Genetics* 77, 71-  
1300 94.
- 1301 Bulow, H.E., Boulin, T., and Hobert, O. (2004). Differential functions of the *C.*  
1302 *elegans* FGF receptor in axon outgrowth and maintenance of axon  
1303 position. *Neuron* 42, 367-374.
- 1304 Burden, S.J., Huijbers, M.G., and Remedio, L. (2018). Fundamental Molecules  
1305 and Mechanisms for Forming and Maintaining Neuromuscular Synapses.  
1306 *Int J Mol Sci* 19.
- 1307 Cescon, M., Gregorio, I., Eiber, N., Borgia, D., Fusto, A., Sabatelli, P., Scorzeto,  
1308 M., Megighian, A., Pegoraro, E., Hashemolhosseini, S., and Bonaldo, P.  
1309 (2018). Collagen VI is required for the structural and functional integrity  
1310 of the neuromuscular junction. *Acta Neuropathol* 136, 483-499.
- 1311 Cheng, S.W., Luk, H.M., Chu, Y.W.Y., Tung, Y.L., Kwan, E.Y., Lo, I.F., and  
1312 Chung, B.H. (2018). A report of three families with FBN1-related  
1313 acromelic dysplasias and review of literature for genotype-phenotype  
1314 correlation in geleophysic dysplasia. *Eur J Med Genet* 61, 219-224.
- 1315 Cherra, S.J., 3rd, and Jin, Y. (2016). A Two-Immunoglobulin-Domain  
1316 Transmembrane Protein Mediates an Epidermal-Neuronal Interaction to  
1317 Maintain Synapse Density. *Neuron* 89, 325-336.
- 1318 Chisholm, A.D., and Hardin, J. (2005). Epidermal morphogenesis. *WormBook*,  
1319 1-22.
- 1320 Chisholm, A.D., and Hsiao, T.I. (2012). The *Caenorhabditis elegans* epidermis  
1321 as a model skin. I: development, patterning, and growth. *Wiley*  
1322 *Interdiscip Rev Dev Biol* 1, 861-878.
- 1323 Chisholm, A.D., and Xu, S. (2012). The *Caenorhabditis elegans* epidermis as a  
1324 model skin. II: differentiation and physiological roles. *Wiley Interdiscip*  
1325 *Rev Dev Biol* 1, 879-902.
- 1326 Colon-Ramos, D.A. (2009). Synapse formation in developing neural circuits.  
1327 *Curr Top Dev Biol* 87, 53-79.
- 1328 Colon-Ramos, D.A., Margeta, M.A., and Shen, K. (2007). Glia promote local  
1329 synaptogenesis through UNC-6 (netrin) signaling in *C. elegans*. *Science*  
1330 318, 103-106.
- 1331 De Jong, L.W., Vidal, J.S., Forsberg, L.E., Zijdenbos, A.P., Haight, T.,  
1332 Alzheimer's Disease Neuroimaging, I., Sigurdsson, S., Gudnason, V.,  
1333 Van Buchem, M.A., and Launer, L.J. (2017). Allometric scaling of brain



- 1334 regions to intra-cranial volume: An epidemiological MRI study. *Hum*  
1335 *Brain Mapp* 38, 151-164.
- 1336 Dear, M.L., Dani, N., Parkinson, W., Zhou, S., and Broadie, K. (2016). Two  
1337 classes of matrix metalloproteinases reciprocally regulate  
1338 synaptogenesis. *Development* 143, 75-87.
- 1339 Dickinson, D.J., Pani, A.M., Heppert, J.K., Higgins, C.D., and Goldstein, B.  
1340 (2015). Streamlined Genome Engineering with a Self-Excising Drug  
1341 Selection Cassette. *Genetics* 200, 1035-1049.
- 1342 Dickinson, D.J., Ward, J.D., Reiner, D.J., and Goldstein, B. (2013). Engineering  
1343 the *Caenorhabditis elegans* genome using Cas9-triggered homologous  
1344 recombination. *Nat Methods* 10, 1028-1034.
- 1345 Eroglu, C., and Barres, B.A. (2010). Regulation of synaptic connectivity by glia.  
1346 *Nature* 468, 223-231.
- 1347 Gottschall, P.E., and Howell, M.D. (2015). ADAMTS expression and function in  
1348 central nervous system injury and disorders. *Matrix Biol* 44-46, 70-76.
- 1349 Graham, P.L., Johnson, J.J., Wang, S., Sibley, M.H., Gupta, M.C., and Kramer,  
1350 J.M. (1997). Type IV collagen is detectable in most, but not all, basement  
1351 membranes of *Caenorhabditis elegans* and assembles on tissues that  
1352 do not express it. *J Cell Biol* 137, 1171-1183.
- 1353 Guo, X.D., Johnson, J.J., and Kramer, J.M. (1991). Embryonic lethality caused  
1354 by mutations in basement membrane collagen of *C. elegans*. *Nature* 349,  
1355 707-709.
- 1356 Hall, D.H.a.A., Z.F. (2008). *worm atlas*. Cold Spring Harbor Laboratory Press.
- 1357 Hasan, U., and Singh, S.K. (2019). The Astrocyte-Neuron Interface: An  
1358 Overview on Molecular and Cellular Dynamics Controlling Formation  
1359 and Maintenance of the Tripartite Synapse. *Methods Mol Biol* 1938, 3-  
1360 18.
- 1361 Heikkinen, A., Haronen, H., Norman, O., and Pihlajaniemi, T. (2019). Collagen  
1362 XIII and Other ECM Components in the Assembly and Disease of the  
1363 Neuromuscular Junction. *Anat Rec (Hoboken)*.
- 1364 Heikkinen, A., Pihlajaniemi, T., Faissner, A., and Yuzaki, M. (2014). Neural ECM  
1365 and synaptogenesis. *Prog Brain Res* 214, 29-51.
- 1366 Hobert, O., and Bulow, H. (2003). Development and maintenance of neuronal  
1367 architecture at the ventral midline of *C. elegans*. *Curr Opin Neurobiol* 13,  
1368 70-78.
- 1369 Howell, M.D., Torres-Collado, A.X., Iruela-Arispe, M.L., and Gottschall, P.E.  
1370 (2012). Selective decline of synaptic protein levels in the frontal cortex  
1371 of female mice deficient in the extracellular metalloproteinase ADAMTS1.  
1372 *PLoS One* 7, e47226.
- 1373 Huang, J., Wang, J., Li, Q., Zhang, Y., and Zhang, X. (2018). Enzyme and  
1374 Chemical Assisted N-Terminal Blocked Peptides Analysis, ENCHANT,

- 1375 as a Selective Proteomics Approach Complementary to Conventional  
1376 Shotgun Approach. *J Proteome Res* 17, 212-221.
- 1377 Huxley, J. (1924). Constant differential growth-ratios and their significance.  
1378 *Nature* 114, 895-896.
- 1379 Huxley J, T.G. (1936). Terminology of growth rates. *Nature* 137, 780-781.
- 1380 Ihara, S., Hagedorn, E.J., Morrissey, M.A., Chi, Q., Motegi, F., Kramer, J.M.,  
1381 and Sherwood, D.R. (2011). Basement membrane sliding and targeted  
1382 adhesion remodels tissue boundaries during uterine-vulval attachment  
1383 in *Caenorhabditis elegans*. *Nat Cell Biol* 13, 641-651.
- 1384 Ihara, S., and Nishiwaki, K. (2007). Prodomain-dependent tissue targeting of  
1385 an ADAMTS protease controls cell migration in *Caenorhabditis elegans*.  
1386 *EMBO J* 26, 2607-2620.
- 1387 Ihara, S., and Nishiwaki, K. (2008). Stage-specific activation of MIG-  
1388 17/ADAMTS controls cell migration in *Caenorhabditis elegans*. *FEBS J*  
1389 275, 4296-4305.
- 1390 Jafari, G., Burghoorn, J., Kawano, T., Mathew, M., Morck, C., Axang, C., Ailion,  
1391 M., Thomas, J.H., Culotti, J.G., Swoboda, P., and Pilon, M. (2010).  
1392 Genetics of extracellular matrix remodeling during organ growth using  
1393 the *Caenorhabditis elegans* pharynx model. *Genetics* 186, 969-982.
- 1394 Jayadev, R., and Sherwood, D.R. (2017). Basement membranes. *Curr Biol* 27,  
1395 R207-R211.
- 1396 Kelwick, R., Desanlis, I., Wheeler, G.N., and Edwards, D.R. (2015). The  
1397 ADAMTS (A Disintegrin and Metalloproteinase with Thrombospondin  
1398 motifs) family. *Genome Biol* 16, 113.
- 1399 Kim, H.S., and Nishiwaki, K. (2015). Control of the basement membrane and  
1400 cell migration by ADAMTS proteinases: Lessons from *C. elegans*  
1401 genetics. *Matrix Biol* 44-46, 64-69.
- 1402 Knight, C.G., Patel, M.N., Azevedo, R.B., and Leroi, A.M. (2002). A novel mode  
1403 of ecdysozoan growth in *Caenorhabditis elegans*. *Evol Dev* 4, 16-27.
- 1404 Koehler, R.C., Roman, R.J., and Harder, D.R. (2009). Astrocytes and the  
1405 regulation of cerebral blood flow. *Trends Neurosci* 32, 160-169.
- 1406 Kramer, J.M. (2005). Basement membranes. *WormBook*, 1-15.
- 1407 Krishnaswamy, V.R., Benbenishty, A., Blinder, P., and Sagi, I. (2019).  
1408 Demystifying the extracellular matrix and its proteolytic remodeling in the  
1409 brain: structural and functional insights. *Cell Mol Life Sci* 76, 3229-3248.
- 1410 Kubota, Y., Kuroki, R., and Nishiwaki, K. (2004). A fibulin-1 homolog interacts  
1411 with an ADAM protease that controls cell migration in *C. elegans*. *Curr*  
1412 *Biol* 14, 2011-2018.
- 1413 Kubota, Y., Nagata, K., Sugimoto, A., and Nishiwaki, K. (2012). Tissue  
1414 architecture in the *Caenorhabditis elegans* gonad depends on  
1415 interactions among fibulin-1, type IV collagen and the ADAMTS  
1416 extracellular protease. *Genetics* 190, 1379-1388.

- 1417 Kubota, Y., Ohkura, K., Tamai, K.K., Nagata, K., and Nishiwaki, K. (2008). MIG-  
1418 17/ADAMTS controls cell migration by recruiting nidogen to the  
1419 basement membrane in *C. elegans*. *Proc Natl Acad Sci U S A* 105,  
1420 20804-20809.
- 1421 Kurshan, P.T., Phan, A.Q., Wang, G.J., Crane, M.M., Lu, H., and Shen, K.  
1422 (2014). Regulation of synaptic extracellular matrix composition is critical  
1423 for proper synapse morphology. *J Neurosci* 34, 12678-12689.
- 1424 Kurshan, P.T., and Shen, K. (2019). Synaptogenic pathways. *Curr Opin*  
1425 *Neurobiol* 57, 156-162.
- 1426 Lhamo, T., and Ismat, A. (2015). The extracellular protease stl functions to  
1427 inhibit migration of v'ch1 sensory neuron during *Drosophila*  
1428 embryogenesis. *Mech Dev* 137, 1-10.
- 1429 Lin, Y.C., and Koleske, A.J. (2010). Mechanisms of synapse and dendrite  
1430 maintenance and their disruption in psychiatric and neurodegenerative  
1431 disorders. *Annu Rev Neurosci* 33, 349-378.
- 1432 Luo, S., Schaefer, A.M., Dour, S., and Nonet, M.L. (2014). The conserved LIM  
1433 domain-containing focal adhesion protein ZYX-1 regulates synapse  
1434 maintenance in *Caenorhabditis elegans*. *Development* 141, 3922-3933.
- 1435 Margeta, M.A., and Shen, K. (2010). Molecular mechanisms of synaptic  
1436 specificity. *Mol Cell Neurosci* 43, 261-267.
- 1437 Mead, T.J., and Apte, S.S. (2018). ADAMTS proteins in human disorders. *Matrix*  
1438 *Biol* 71-72, 225-239.
- 1439 Mello, C.C., Kramer, J.M., Stinchcomb, D., and Ambros, V. (1991). Efficient  
1440 gene transfer in *C.elegans*: extrachromosomal maintenance and  
1441 integration of transforming sequences. *EMBO J* 10, 3959-3970.
- 1442 Meyer, S., Schmidt, I., and Klambt, C. (2014). Glia ECM interactions are  
1443 required to shape the *Drosophila* nervous system. *Mech Dev* 133, 105-  
1444 116.
- 1445 Miguel, R.F., Pollak, A., and Lubec, G. (2005). Metalloproteinase ADAMTS-1  
1446 but not ADAMTS-5 is manifold overexpressed in neurodegenerative  
1447 disorders as Down syndrome, Alzheimer's and Pick's disease. *Brain Res*  
1448 *Mol Brain Res* 133, 1-5.
- 1449 Minevich, G., Park, D.S., Blankenberg, D., Poole, R.J., and Hobert, O. (2012).  
1450 CloudMap: a cloud-based pipeline for analysis of mutant genome  
1451 sequences. *Genetics* 192, 1249-1269.
- 1452 Molofsky, A.V., Kelley, K.W., Tsai, H.H., Redmond, S.A., Chang, S.M.,  
1453 Madireddy, L., Chan, J.R., Baranzini, S.E., Ullian, E.M., and Rowitch,  
1454 D.H. (2014). Astrocyte-encoded positional cues maintain sensorimotor  
1455 circuit integrity. *Nature* 509, 189-194.
- 1456 Morita, K., Flemming, A.J., Sugihara, Y., Mochii, M., Suzuki, Y., Yoshida, S.,  
1457 Wood, W.B., Kohara, Y., Leroi, A.M., and Ueno, N. (2002). A  
1458 *Caenorhabditis elegans* TGF-beta, DBL-1, controls the expression of

- 1459 LON-1, a PR-related protein, that regulates polyploidization and body  
1460 length. *EMBO J* 21, 1063-1073.
- 1461 Morrissey, M.A., Jayadev, R., Miley, G.R., Blebea, C.A., Chi, Q., Ihara, S., and  
1462 Sherwood, D.R. (2016). SPARC Promotes Cell Invasion In Vivo by  
1463 Decreasing Type IV Collagen Levels in the Basement Membrane. *PLoS*  
1464 *Genet* 12, e1005905.
- 1465 Nishiwaki, K. (1999). Mutations affecting symmetrical migration of distal tip cells  
1466 in *Caenorhabditis elegans*. *Genetics* 152, 985-997.
- 1467 Nishiwaki, K., Hisamoto, N., and Matsumoto, K. (2000). A metalloprotease  
1468 disintegrin that controls cell migration in *Caenorhabditis elegans*.  
1469 *Science* 288, 2205-2208.
- 1470 Noblett, N., Wu, Z., Ding, Z.H., Park, S., Roenspies, T., Flibotte, S., Chisholm,  
1471 A.D., Jin, Y., and Colavita, A. (2019). DIP-2 suppresses ectopic neurite  
1472 sprouting and axonal regeneration in mature neurons. *J Cell Biol* 218,  
1473 125-133.
- 1474 Nonet, M.L. (1999). Visualization of synaptic specializations in live *C. elegans*  
1475 with synaptic vesicle protein-GFP fusions. *J Neurosci Methods* 89, 33-  
1476 40.
- 1477 Nystrom, J., Shen, Z.Z., Aili, M., Flemming, A.J., Leroi, A., and Tuck, S. (2002).  
1478 Increased or decreased levels of *Caenorhabditis elegans* lon-3, a gene  
1479 encoding a collagen, cause reciprocal changes in body length. *Genetics*  
1480 161, 83-97.
- 1481 Park, D., Bae, S., Yoon, T.H., and Ko, J. (2018). Molecular Mechanisms of  
1482 Synaptic Specificity: Spotlight on Hippocampal and Cerebellar Synapse  
1483 Organizers. *Mol Cells* 41, 373-380.
- 1484 Patton, B.L. (2003). Basal lamina and the organization of neuromuscular  
1485 synapses. *J Neurocytol* 32, 883-903.
- 1486 Pocock, R., Benard, C.Y., Shapiro, L., and Hobert, O. (2008). Functional  
1487 dissection of the *C. elegans* cell adhesion molecule SAX-7, a homologue  
1488 of human L1. *Mol Cell Neurosci* 37, 56-68.
- 1489 Qin, J., Liang, J., and Ding, M. (2014). Perlecan antagonizes collagen IV and  
1490 ADAMTS9/GON-1 in restricting the growth of presynaptic boutons. *J*  
1491 *Neurosci* 34, 10311-10324.
- 1492 Ramirez-Suarez, N.J., Belalcazar, H.M., Salazar, C.J., Beyaz, B., Raja, B.,  
1493 Nguyen, K.C.Q., Celestrin, K., Fredens, J., Faergeman, N.J., Hall, D.H.,  
1494 and Bulow, H.E. (2019). Axon-Dependent Patterning and Maintenance  
1495 of Somatosensory Dendritic Arbors. *Dev Cell* 48, 229-244 e224.
- 1496 Rawson, R.L., Martin, E.A., and Williams, M.E. (2017). Mechanisms of input  
1497 and output synaptic specificity: finding partners, building synapses, and  
1498 fine-tuning communication. *Curr Opin Neurobiol* 45, 39-44.

- 1499 Rivera, S., Garcia-Gonzalez, L., Khrestchatisky, M., and Baranger, K. (2019).  
1500 Metalloproteinases and their tissue inhibitors in Alzheimer's disease and  
1501 other neurodegenerative disorders. *Cell Mol Life Sci*.
- 1502 Rogers, R.S., and Nishimune, H. (2017). The role of laminins in the organization  
1503 and function of neuromuscular junctions. *Matrix Biol* 57-58, 86-105.
- 1504 Sanes, J.R., and Yamagata, M. (2009). Many paths to synaptic specificity. *Annu*  
1505 *Rev Cell Dev Biol* 25, 161-195.
- 1506 Shaham, S. (2015). Glial development and function in the nervous system of  
1507 *Caenorhabditis elegans*. *Cold Spring Harb Perspect Biol* 7, a020578.
- 1508 Shao, Z., Watanabe, S., Christensen, R., Jorgensen, E.M., and Colon-Ramos,  
1509 D.A. (2013). Synapse location during growth depends on glia location.  
1510 *Cell* 154, 337-350.
- 1511 Shen, K., and Bargmann, C.I. (2003). The immunoglobulin superfamily protein  
1512 SYG-1 determines the location of specific synapses in *C. elegans*. *Cell*  
1513 112, 619-630.
- 1514 Shibata, Y., Kawakado, Y., Hori, N., Tanaka, K., Inoue, R., Takano, T., Kubota,  
1515 Y., and Nishiwaki, K. (2016). Organ Length Control by an ADAMTS  
1516 Extracellular Protease in *Caenorhabditis elegans*. *G3 (Bethesda)* 6,  
1517 1449-1457.
- 1518 Shimosono, M., Osaka, J., Kato, Y., Araki, T., Kawamura, H., Takechi, H.,  
1519 Hakeda-Suzuki, S., and Suzuki, T. (2019). Cell surface molecule,  
1520 Klingon, mediates the refinement of synaptic specificity in the *Drosophila*  
1521 visual system. *Genes Cells* 24, 496-510.
- 1522 Sibley, M.H., Johnson, J.J., Mello, C.C., and Kramer, J.M. (1993). Genetic  
1523 identification, sequence, and alternative splicing of the *Caenorhabditis*  
1524 *elegans* alpha 2(IV) collagen gene. *J Cell Biol* 123, 255-264.
- 1525 Singhal, N., and Martin, P.T. (2011). Role of extracellular matrix proteins and  
1526 their receptors in the development of the vertebrate neuromuscular  
1527 junction. *Dev Neurobiol* 71, 982-1005.
- 1528 Skeath, J.B., Wilson, B.A., Romero, S.E., Snee, M.J., Zhu, Y., and Lacin, H.  
1529 (2017). The extracellular metalloprotease AdamTS-A anchors neural  
1530 lineages in place within and preserves the architecture of the central  
1531 nervous system. *Development* 144, 3102-3113.
- 1532 Song, I., and Dityatev, A. (2018). Crosstalk between glia, extracellular matrix  
1533 and neurons. *Brain Res Bull* 136, 101-108.
- 1534 Stork, T., Engelen, D., Krudewig, A., Silies, M., Bainton, R.J., and Klambt, C.  
1535 (2008). Organization and function of the blood-brain barrier in *Drosophila*.  
1536 *J Neurosci* 28, 587-597.
- 1537 Suzuki, Y., Morris, G.A., Han, M., and Wood, W.B. (2002). A cuticle collagen  
1538 encoded by the *lon-3* gene may be a target of TGF-beta signaling in  
1539 determining *Caenorhabditis elegans* body shape. *Genetics* 162, 1631-  
1540 1639.

- 1541 Sytnyk, V., Leshchyns'ka, I., and Schachner, M. (2017). Neural Cell Adhesion  
1542 Molecules of the Immunoglobulin Superfamily Regulate Synapse  
1543 Formation, Maintenance, and Function. *Trends Neurosci* 40, 295-308.
- 1544 Tam, S.J., and Watts, R.J. (2010). Connecting vascular and nervous system  
1545 development: angiogenesis and the blood-brain barrier. *Annu Rev*  
1546 *Neurosci* 33, 379-408.
- 1547 Thomsen, M.S., Birkelund, S., Burkhart, A., Stensballe, A., and Moos, T. (2017).  
1548 Synthesis and deposition of basement membrane proteins by primary  
1549 brain capillary endothelial cells in a murine model of the blood-brain  
1550 barrier. *J Neurochem* 140, 741-754.
- 1551 Tsai, H.H., Li, H., Fuentealba, L.C., Molofsky, A.V., Taveira-Marques, R.,  
1552 Zhuang, H., Tenney, A., Murnen, A.T., Fancy, S.P., Merkle, F., Kessar, N.,  
1553 Alvarez-Buylla, A., Richardson, W.D., and Rowitch, D.H. (2012).  
1554 Regional astrocyte allocation regulates CNS synaptogenesis and repair.  
1555 *Science* 337, 358-362.
- 1556 Ullian, E.M., Sapperstein, S.K., Christopherson, K.S., and Barres, B.A. (2001).  
1557 Control of synapse number by glia. *Science* 291, 657-661.
- 1558 Van Horn, M.R., and Ruthazer, E.S. (2019). Glial regulation of synapse  
1559 maturation and stabilization in the developing nervous system. *Curr Opin*  
1560 *Neurobiol* 54, 113-119.
- 1561 Verheijen, F.W., Verbeek, E., Aula, N., Beerens, C.E., Havelaar, A.C., Joosse,  
1562 M., Peltonen, L., Aula, P., Galjaard, H., Van Der Spek, P.J., and Mancini,  
1563 G.M. (1999). A new gene, encoding an anion transporter, is mutated in  
1564 sialic acid storage diseases. *Nat Genet* 23, 462-465.
- 1565 White, J.G., Southgate, E., Thomson, J.N., and Brenner, S. (1986). The  
1566 structure of the nervous system of the nematode *Caenorhabditis*  
1567 *elegans*. *Philos Trans R Soc Lond B Biol Sci* 314, 1-340.
- 1568 Williams, B.D., and Waterston, R.H. (1994). Genes critical for muscle  
1569 development and function in *Caenorhabditis elegans* identified through  
1570 lethal mutations. *J Cell Biol* 124, 475-490.
- 1571 Wisniewski, J.R., Zougman, A., Nagaraj, N., and Mann, M. (2009). Universal  
1572 sample preparation method for proteome analysis. *Nat Methods* 6, 359-  
1573 362.
- 1574 Woo, W.M., Berry, E., Hudson, M.L., Swale, R.E., Goncharov, A., and Chisholm,  
1575 A.D. (2008). The *C. elegans* F-spondin family protein SPON-1 maintains  
1576 cell adhesion in neural and non-neural tissues. *Development* 135, 2747-  
1577 2756.
- 1578 Xu, L., Nirwane, A., and Yao, Y. (2019). Basement membrane and blood-brain  
1579 barrier. *Stroke Vasc Neurol* 4, 78-82.
- 1580 Zhong, S., and Khalil, R.A. (2019). A Disintegrin and Metalloproteinase (ADAM)  
1581 and ADAM with thrombospondin motifs (ADAMTS) family in vascular  
1582 biology and disease. *Biochem Pharmacol* 164, 188-204.

1583 Zhou, S., Opperman, K., Wang, X., and Chen, L. (2008). unc-44 Ankyrin and  
1584 stn-2 gamma-syntrophin regulate sax-7 L1CAM function in maintaining  
1585 neuronal positioning in *Caenorhabditis elegans*. *Genetics* 180, 1429-  
1586 1443.  
1587

Figure 1

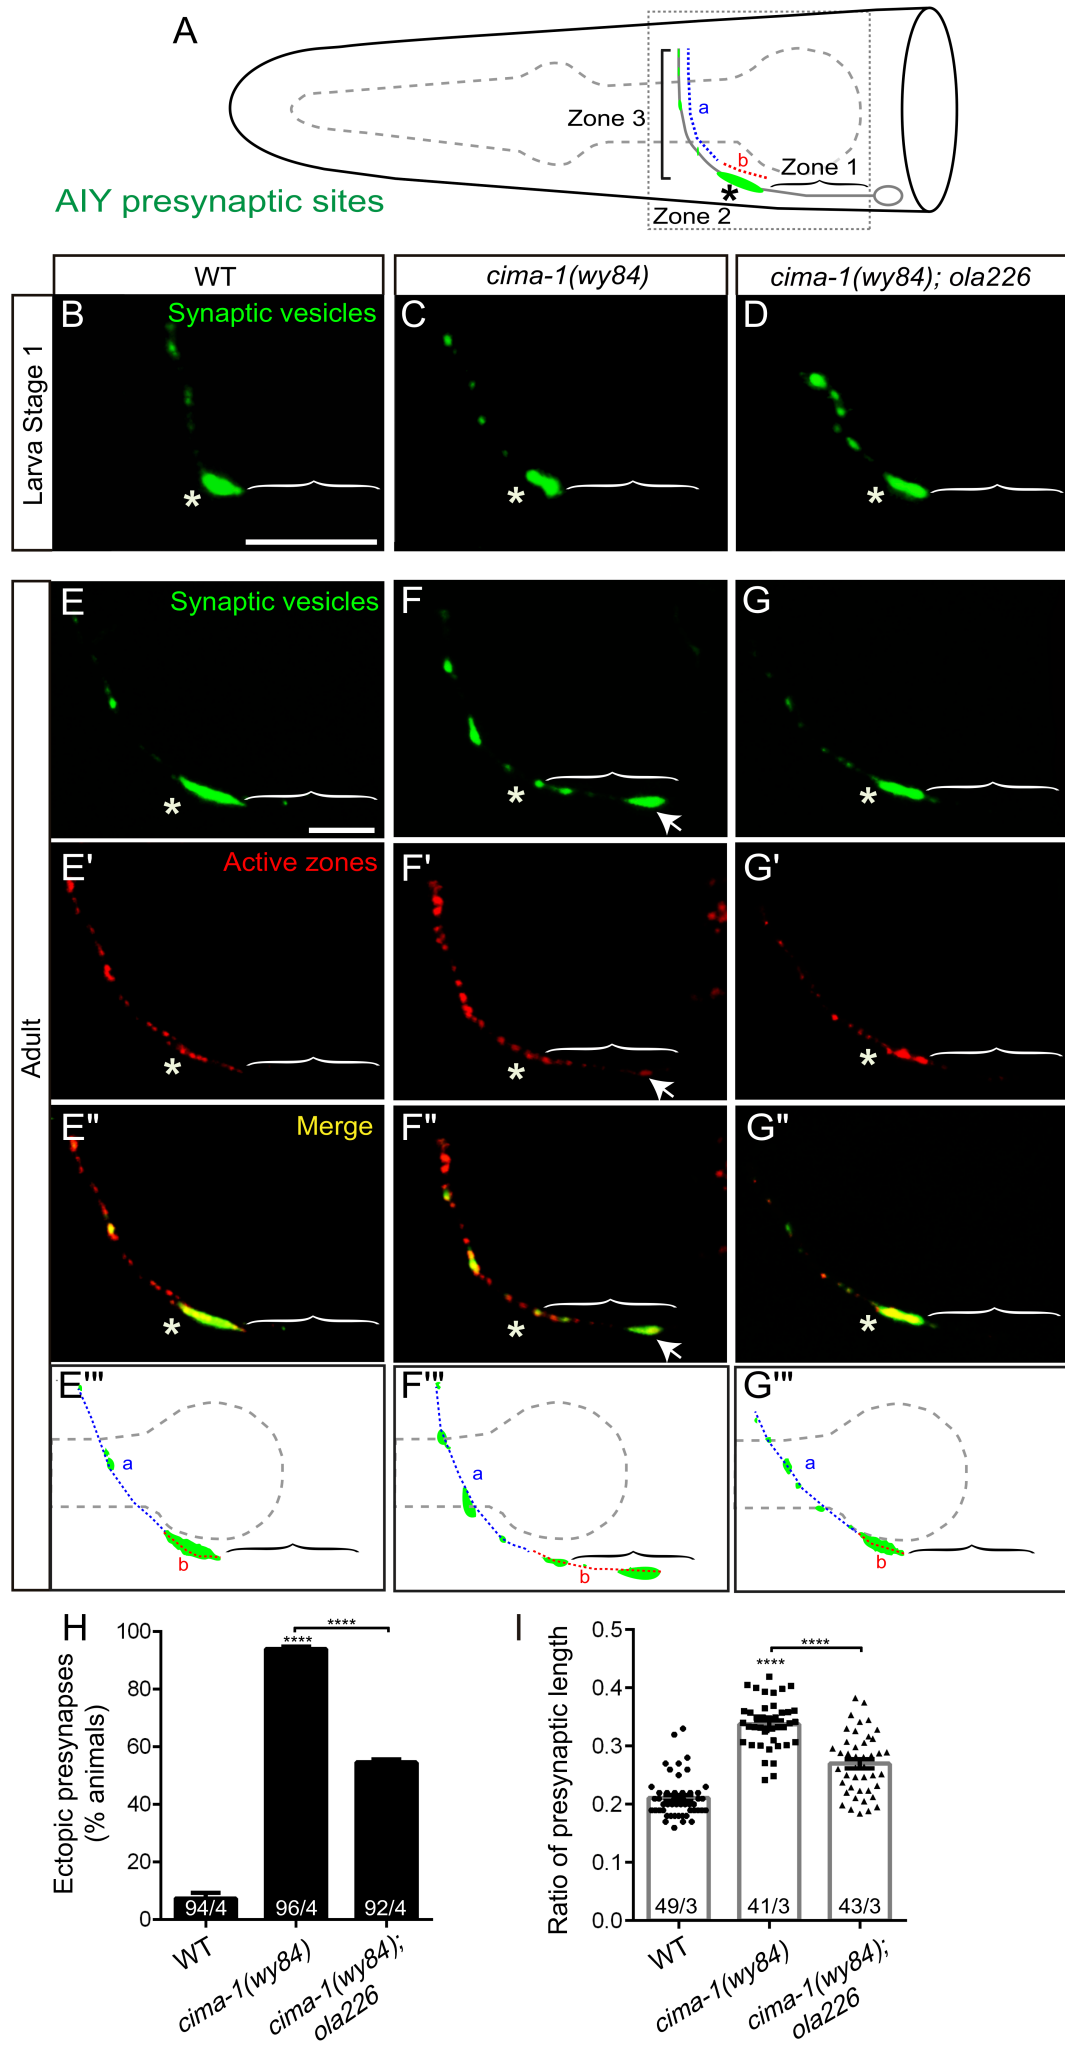



**Figure 2**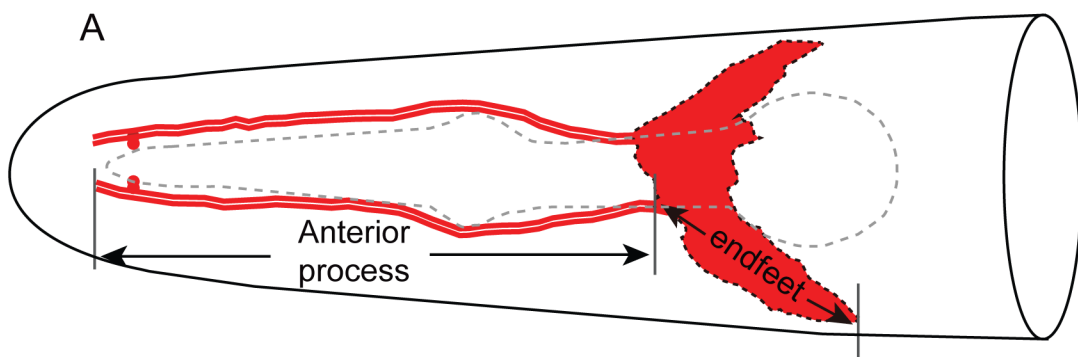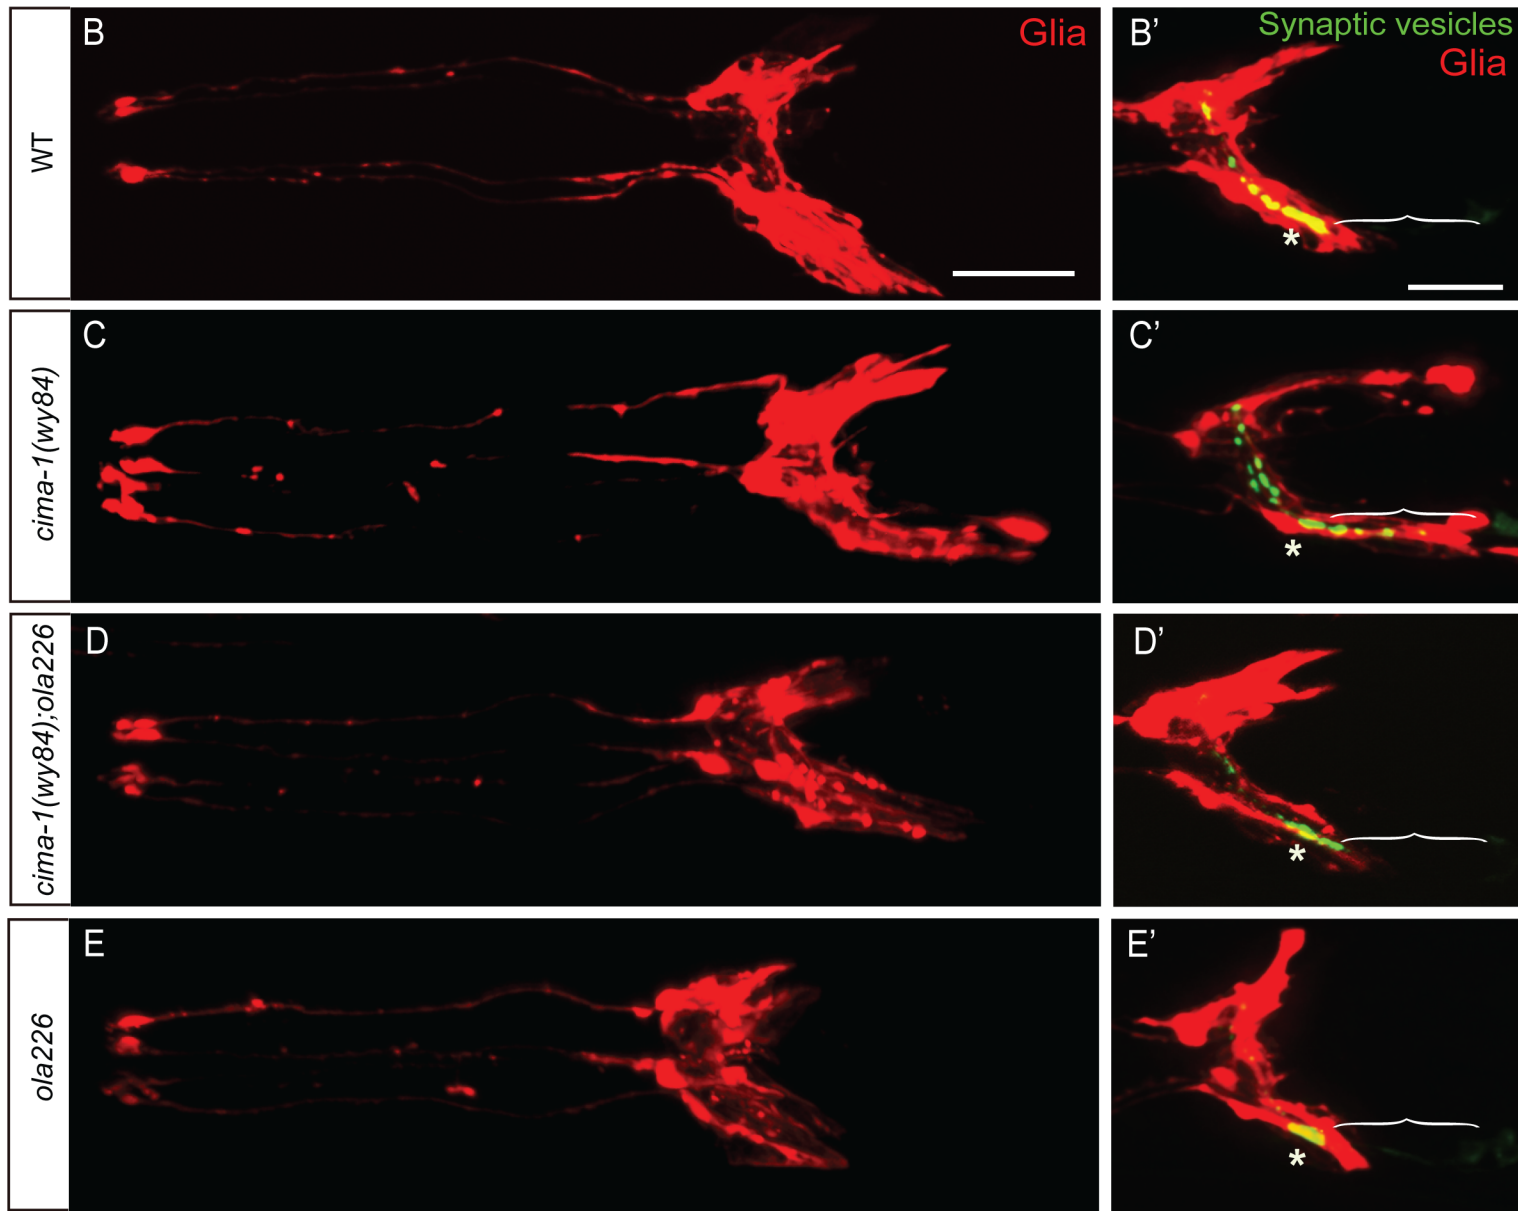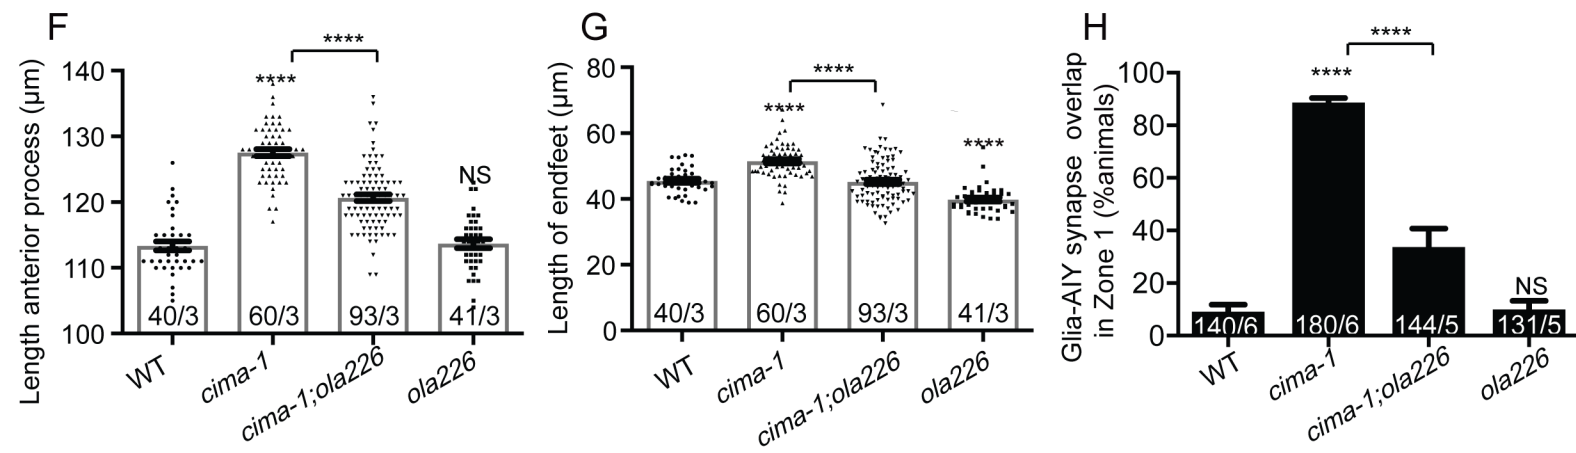

**Figure 3**

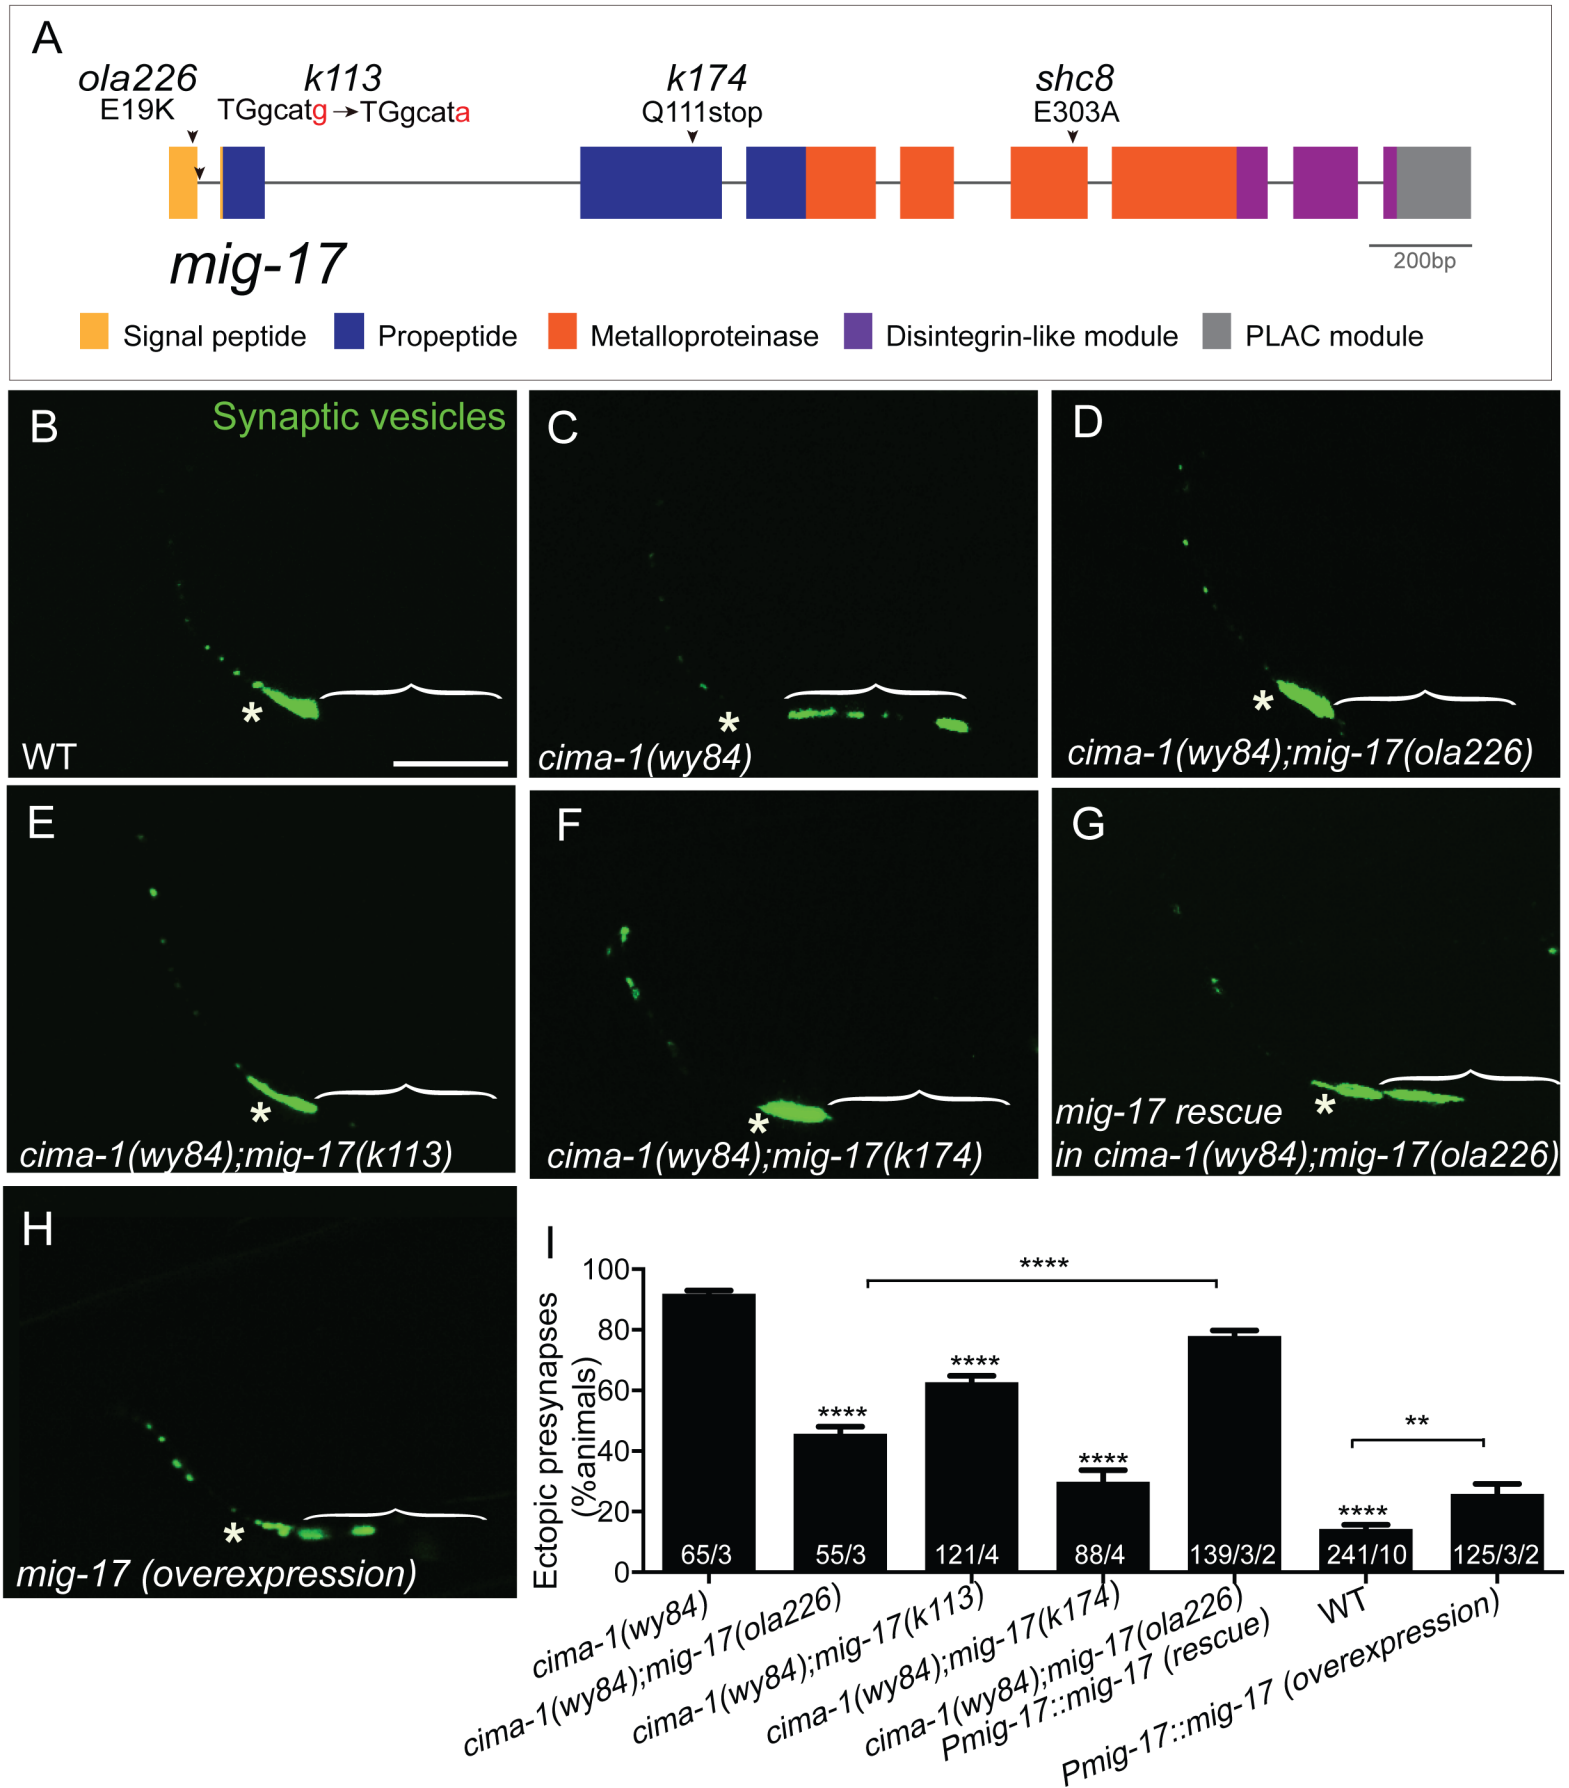

Figure 4

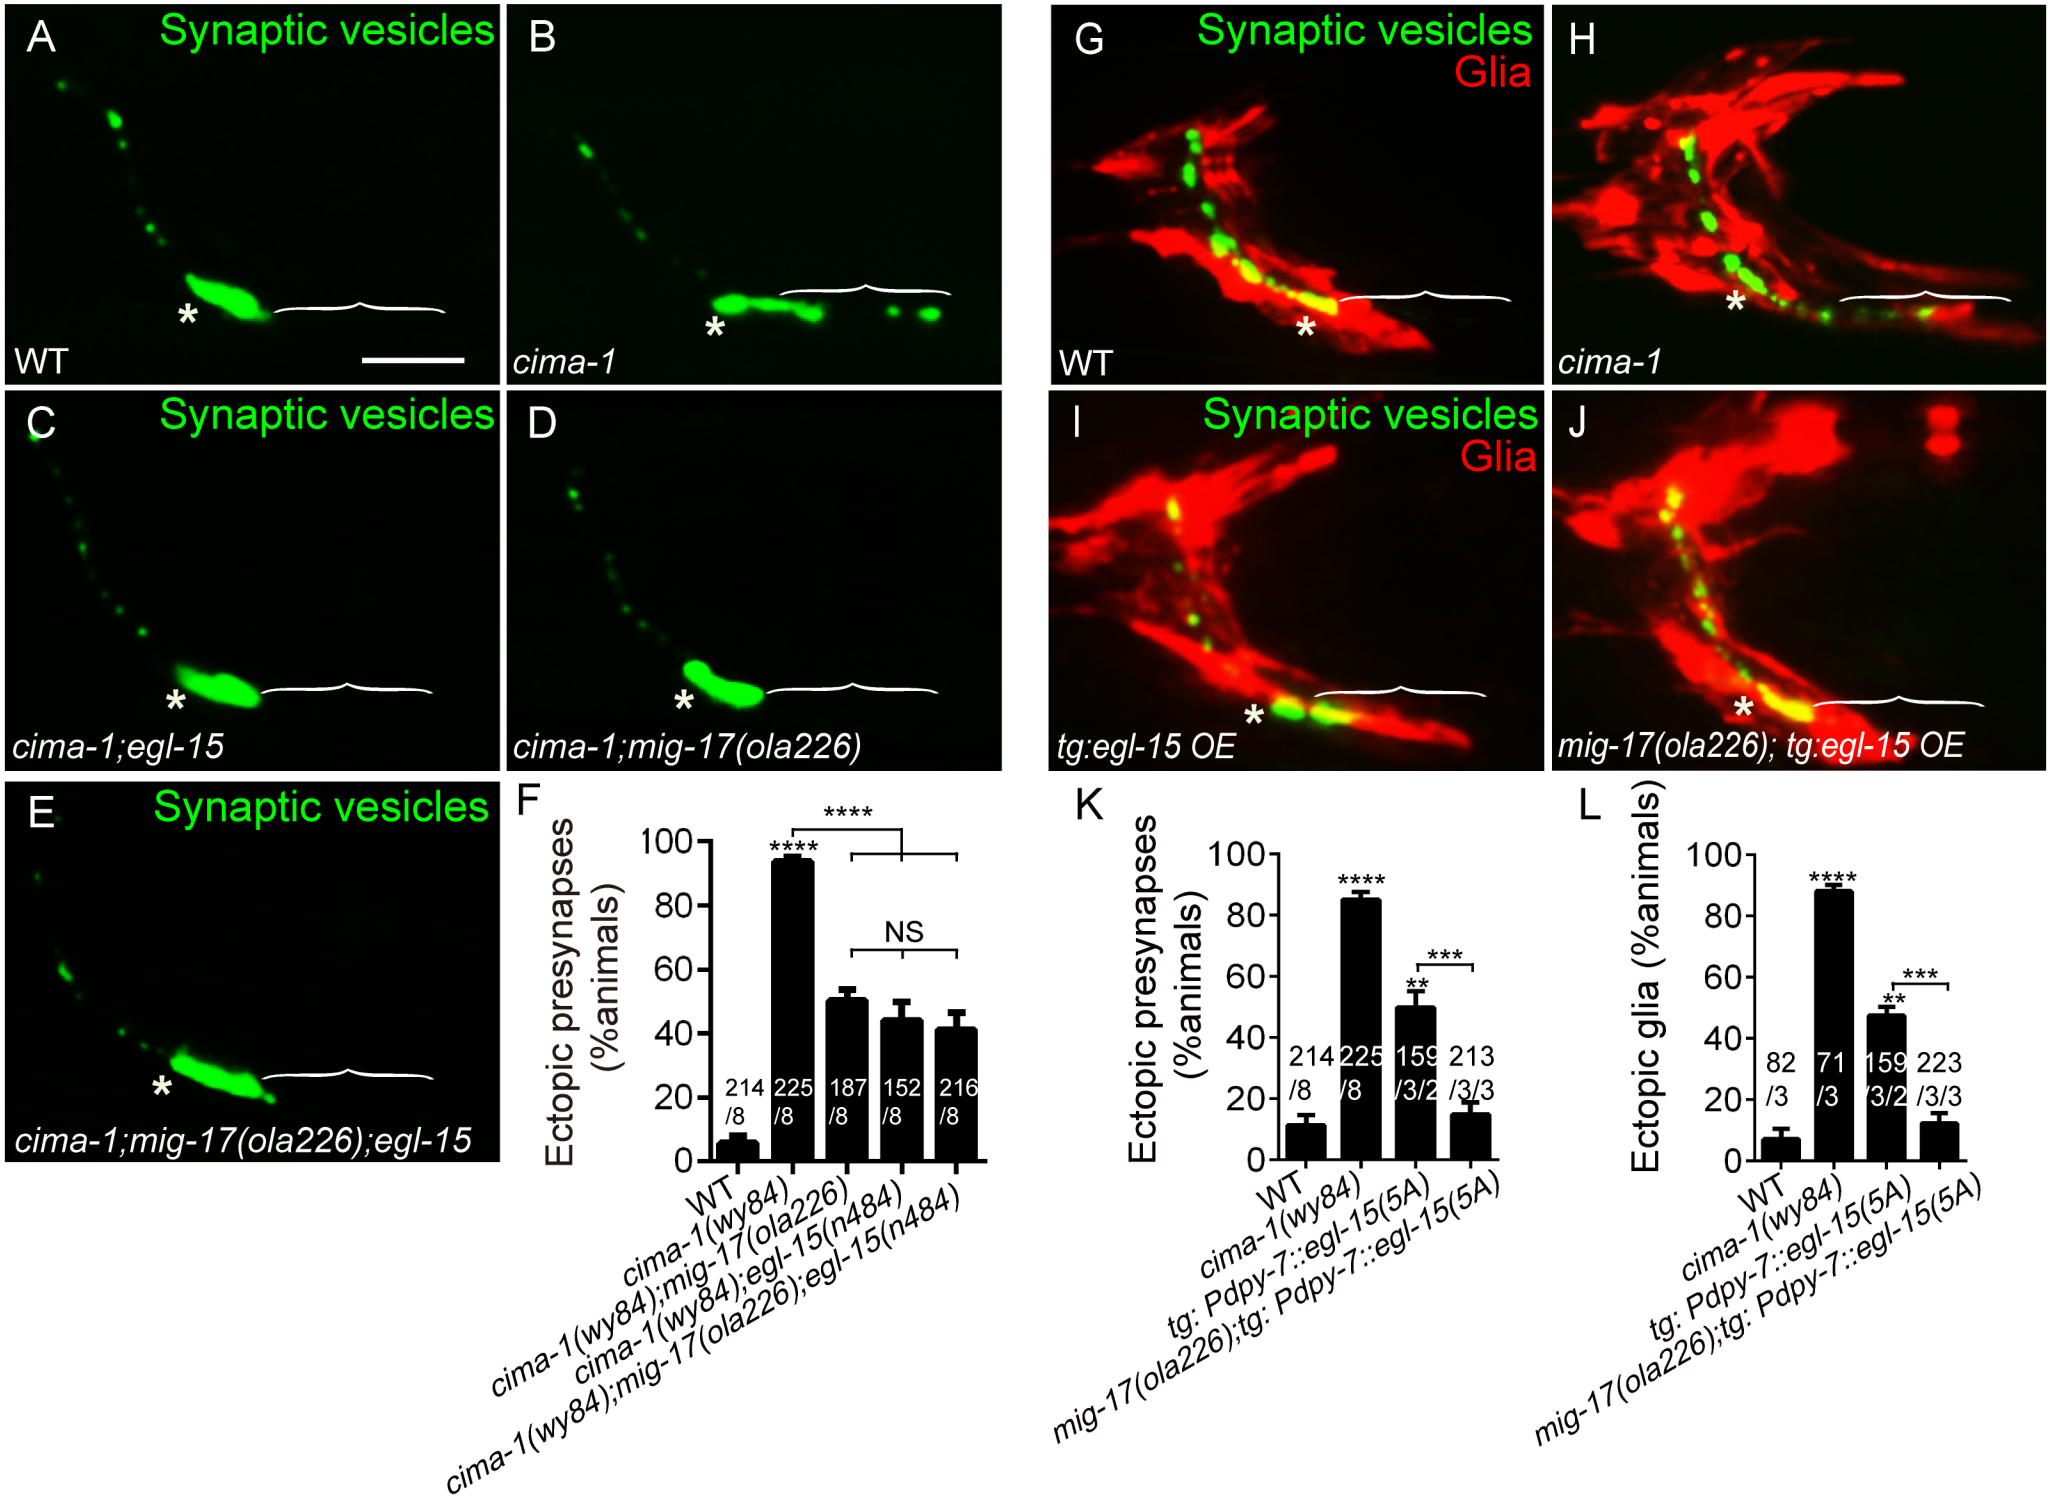

Figure 5

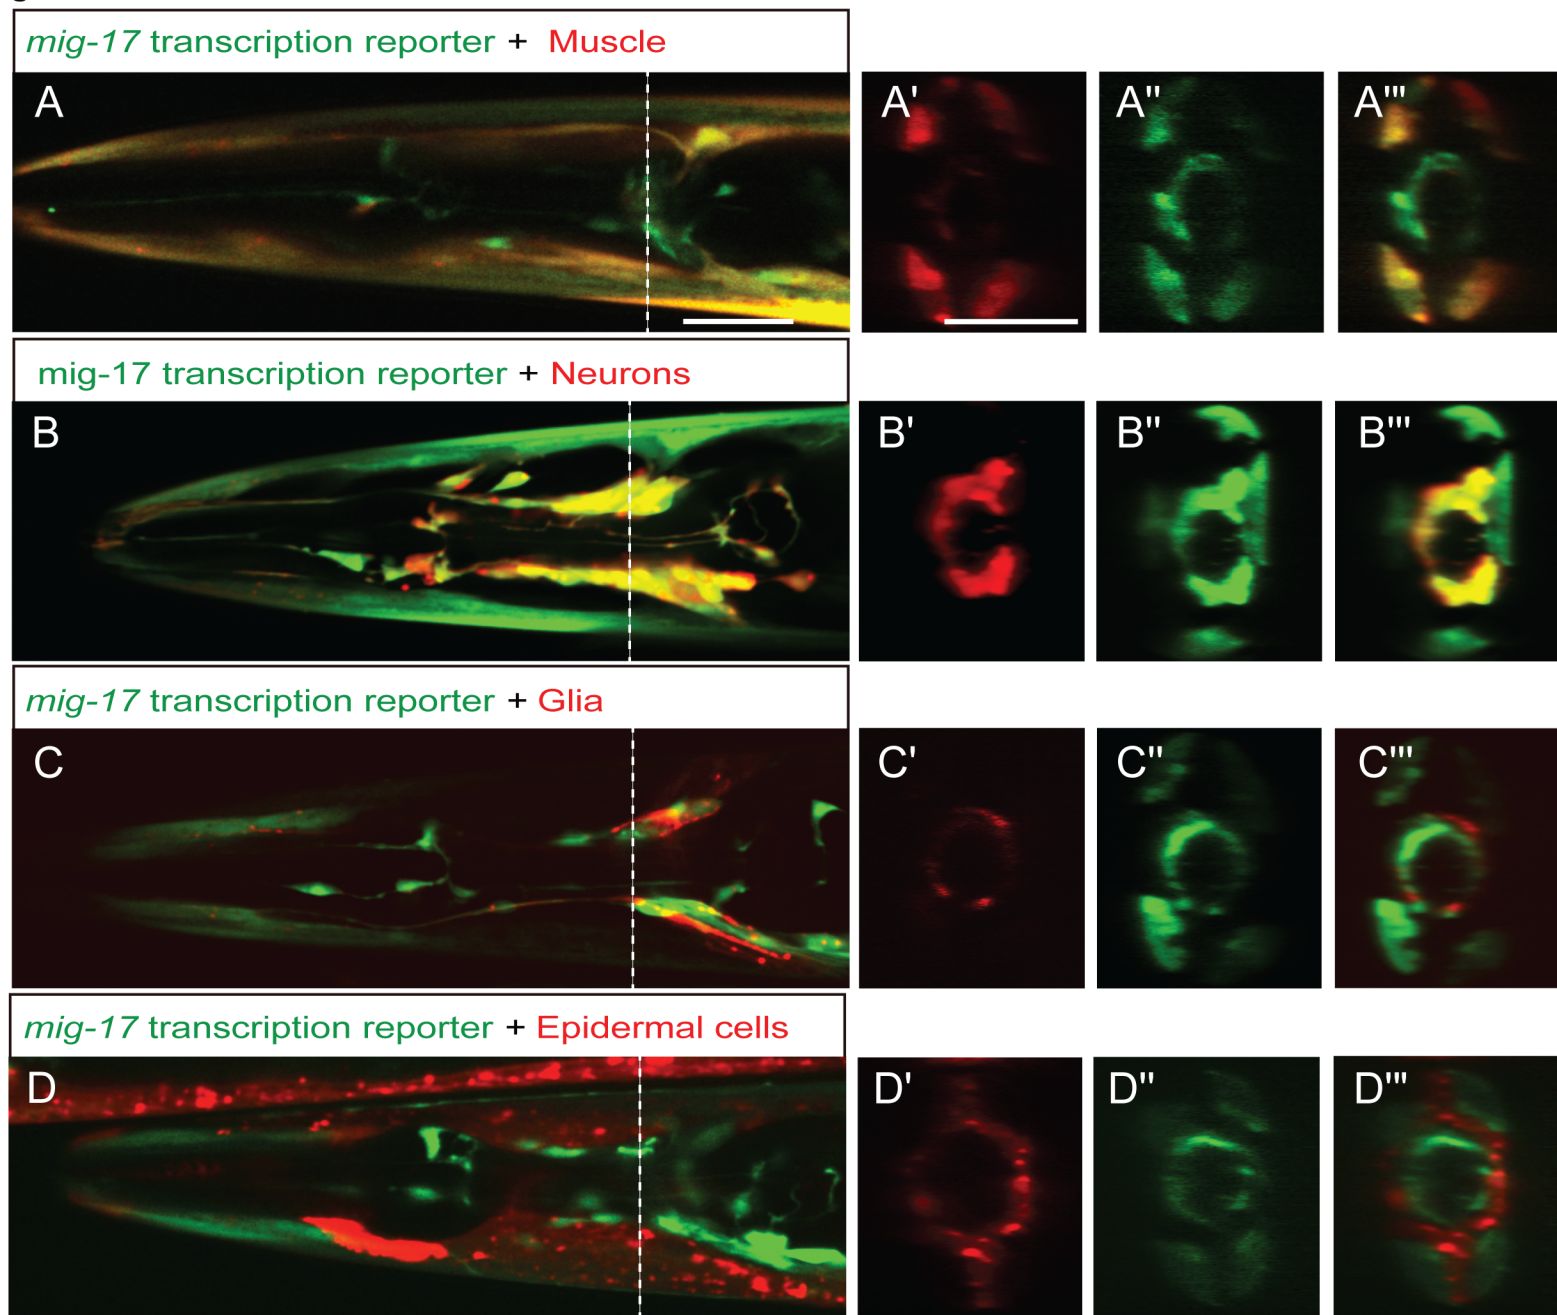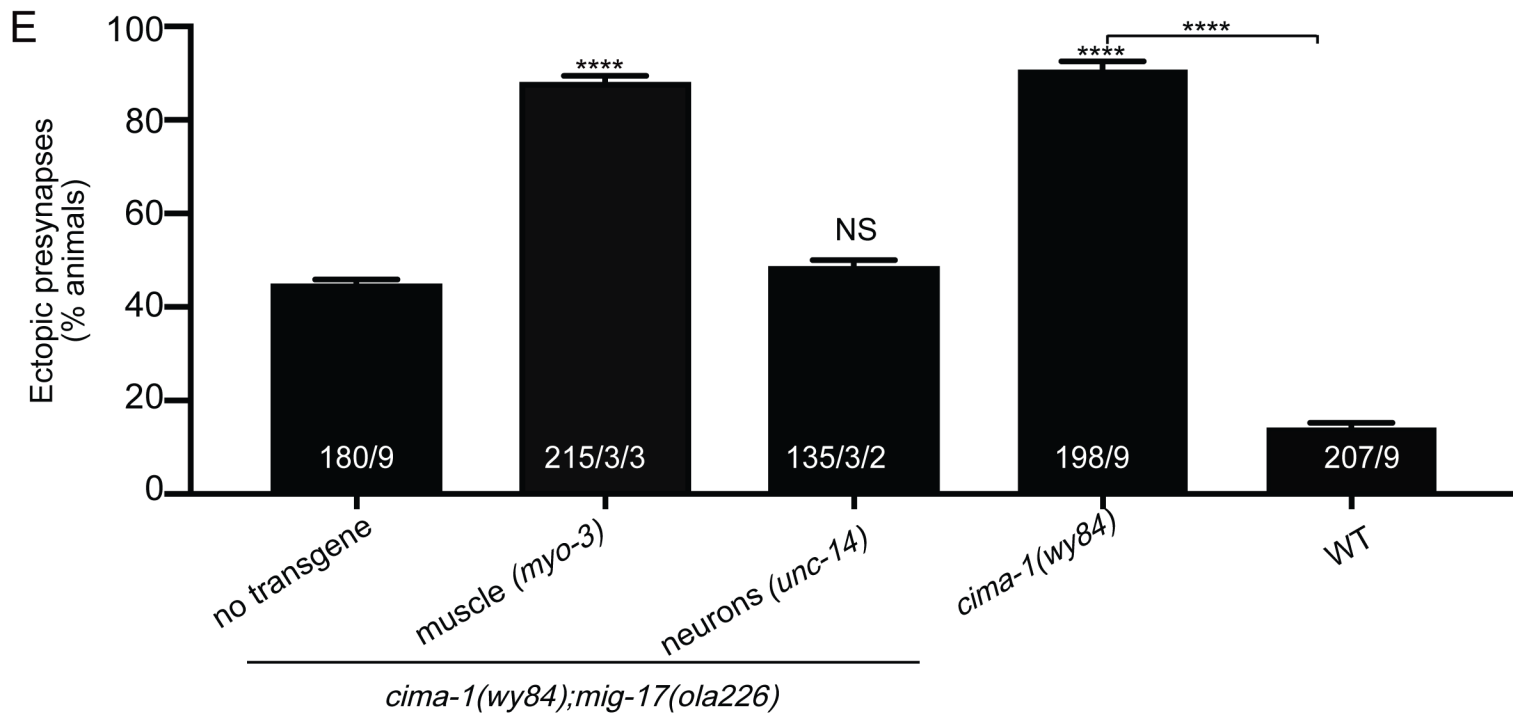

Figure 6

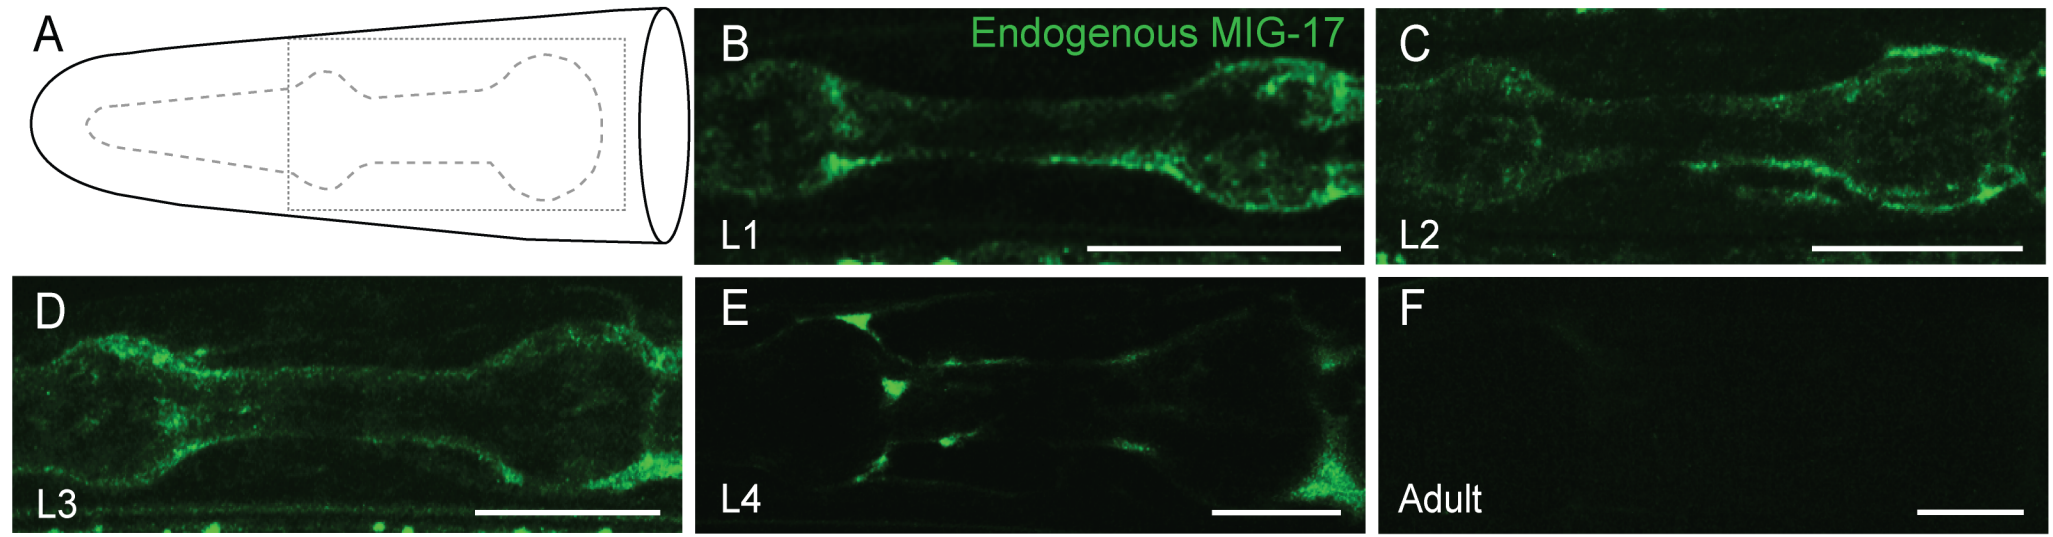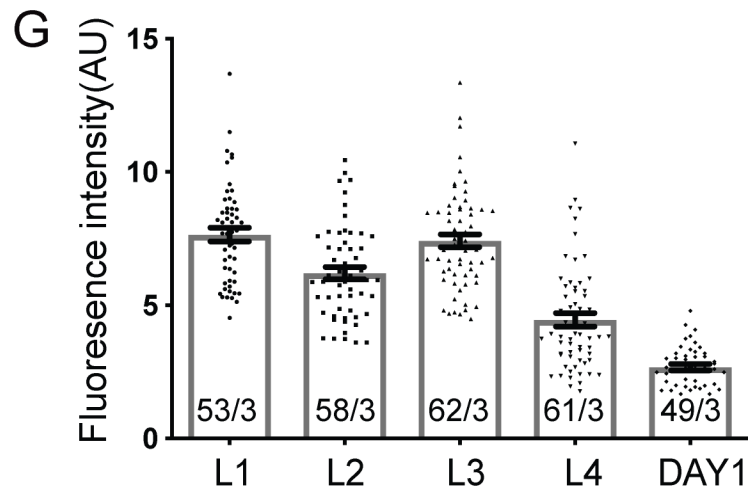

**H** P value for paired comparison

|      | L1      | L2      | L3      | L4      |
|------|---------|---------|---------|---------|
| L2   | <0.0001 |         |         |         |
| L3   | 0.5254  | 0.0003  |         |         |
| L4   | <0.0001 | <0.0001 | <0.0001 |         |
| DAY1 | <0.0001 | <0.0001 | <0.0001 | <0.0001 |

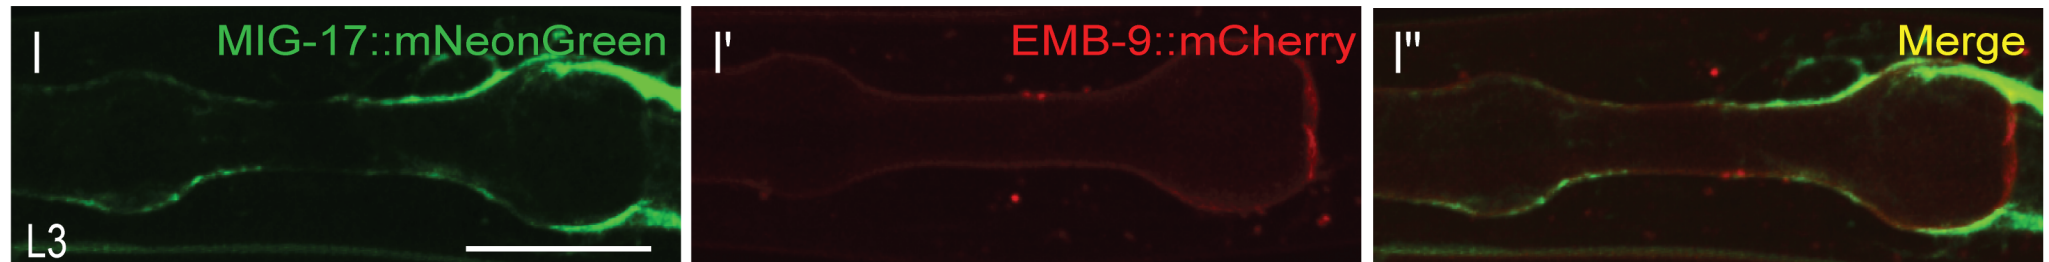

Figure 7

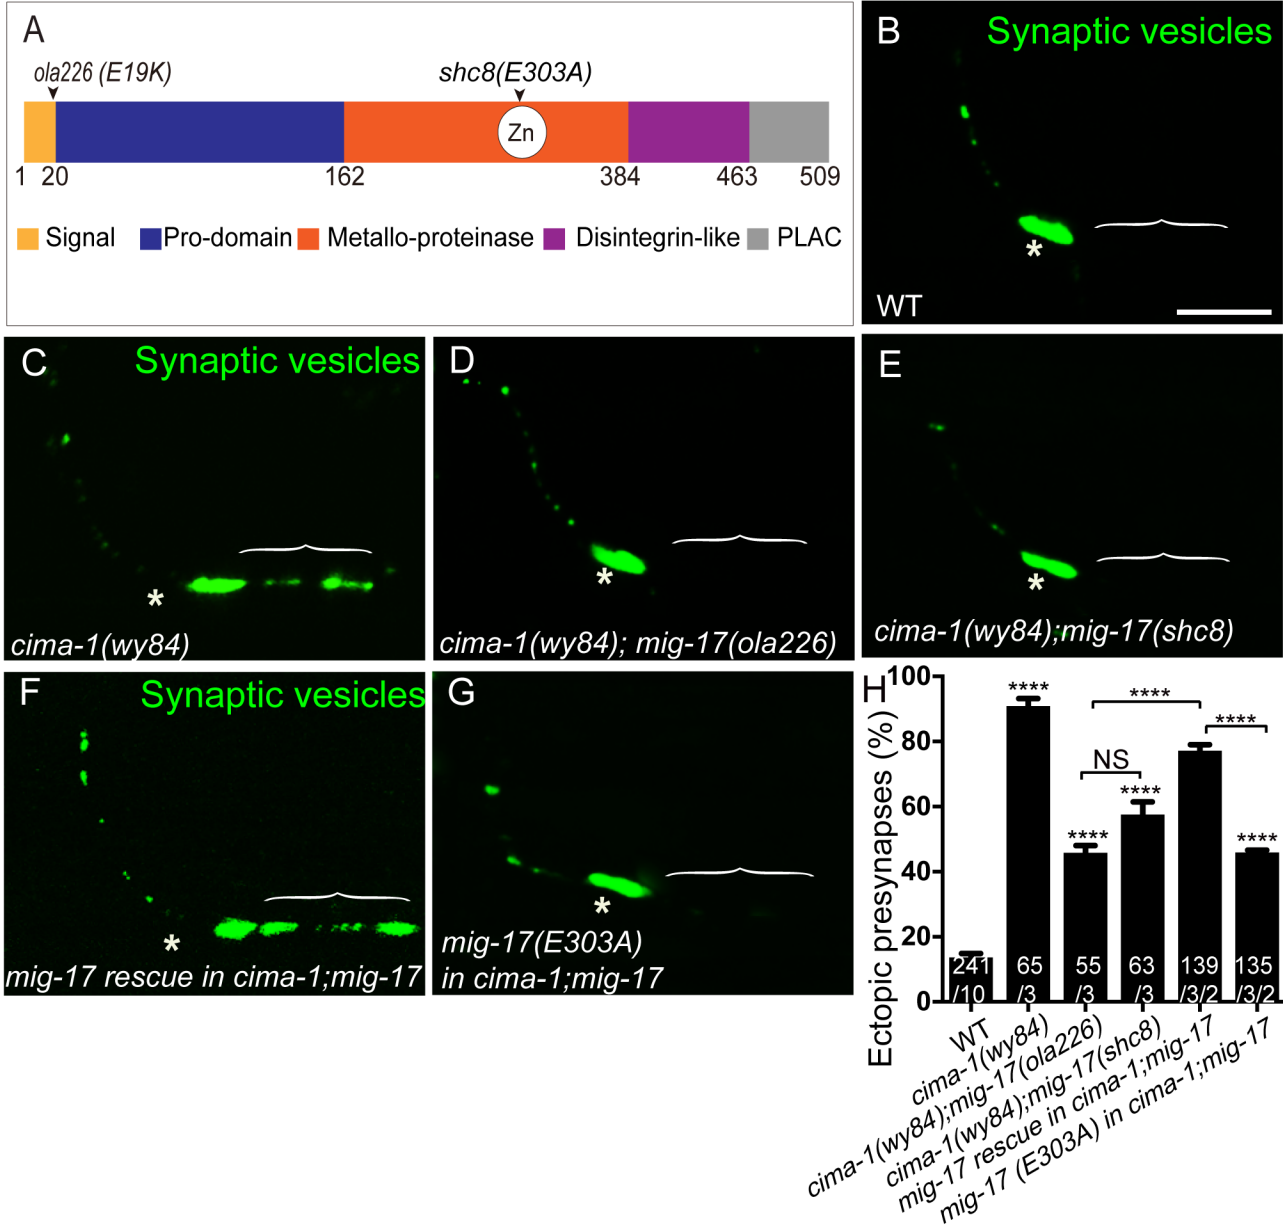

Figure 8

A

| Protein | Fold change <i>mig-17(ola226)/WT</i> | Alleles tested  | Suppression of <i>cima-1(wy84)</i> |
|---------|--------------------------------------|-----------------|------------------------------------|
| EPI-1   | 3.82                                 | NA              | NA                                 |
| OST-1   | 2.00                                 | <i>gk786697</i> | ++                                 |
|         |                                      | <i>gk193465</i> | ++                                 |
| UNC-52  | 1.81                                 | <i>e1421</i>    | +                                  |
| LET-2   | 1.80                                 | <i>k193</i>     | -                                  |
|         |                                      | <i>b246</i>     | -                                  |
| NID-1   | 1.73                                 | <i>cg118</i>    | +                                  |
|         |                                      | <i>cg119</i>    | +                                  |
| EMB-9   | 1.43                                 | <i>tk75</i>     | +                                  |
|         |                                      | <i>xd51</i>     | ++                                 |
| LAM-1   | 1.43                                 | NA              | NA                                 |
| LAM-2   | 1.36                                 | NA              | NA                                 |

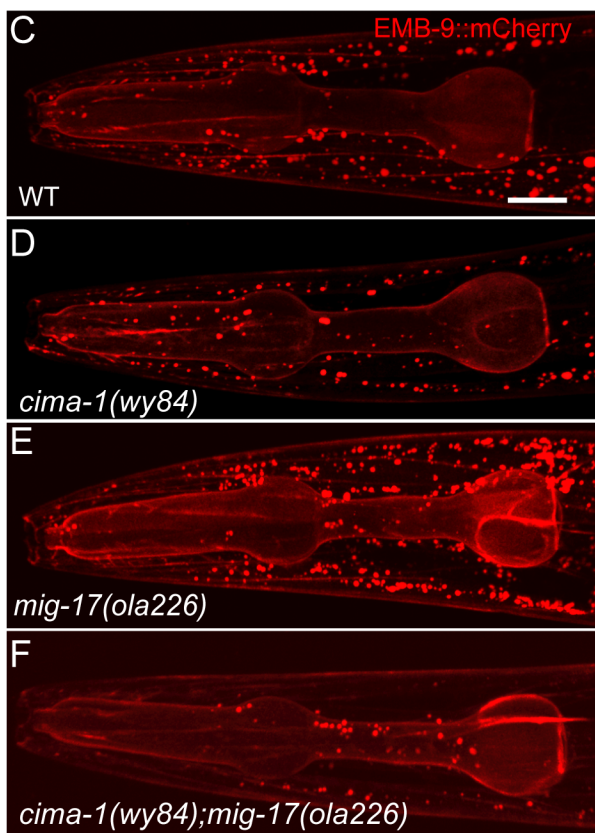

B

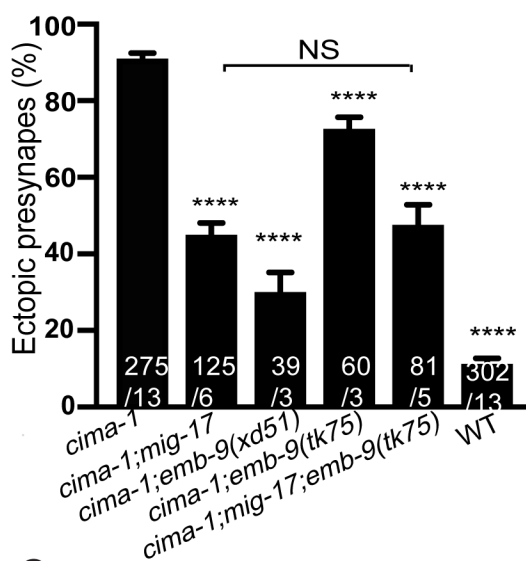

G

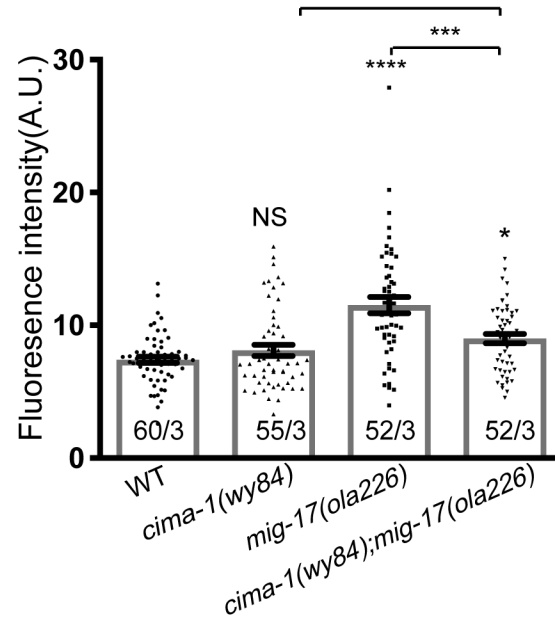

H

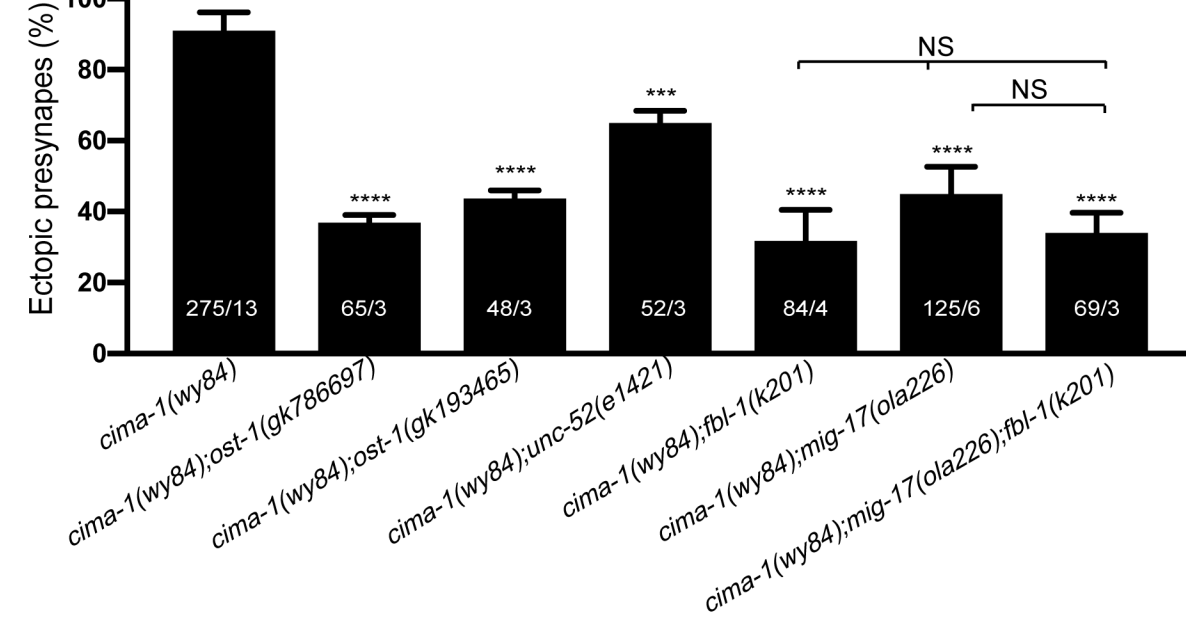

Figure 9

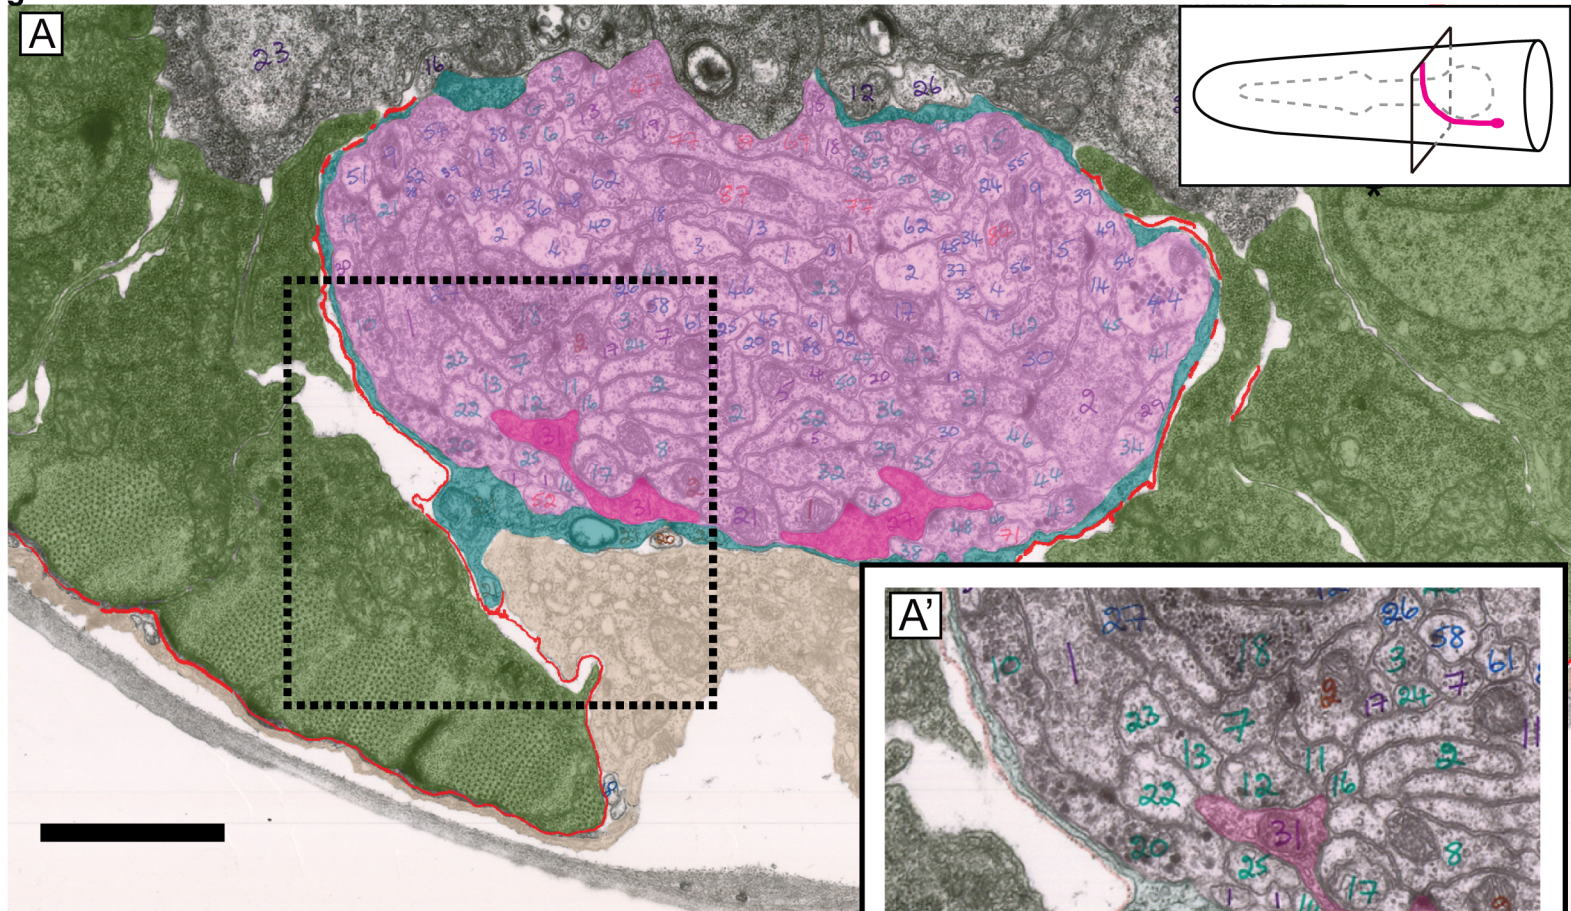

|            |                   |
|------------|-------------------|
| Nerve ring | Epidermis         |
| AIY Zone 2 | Basement membrane |
| Glia       | Muscle            |

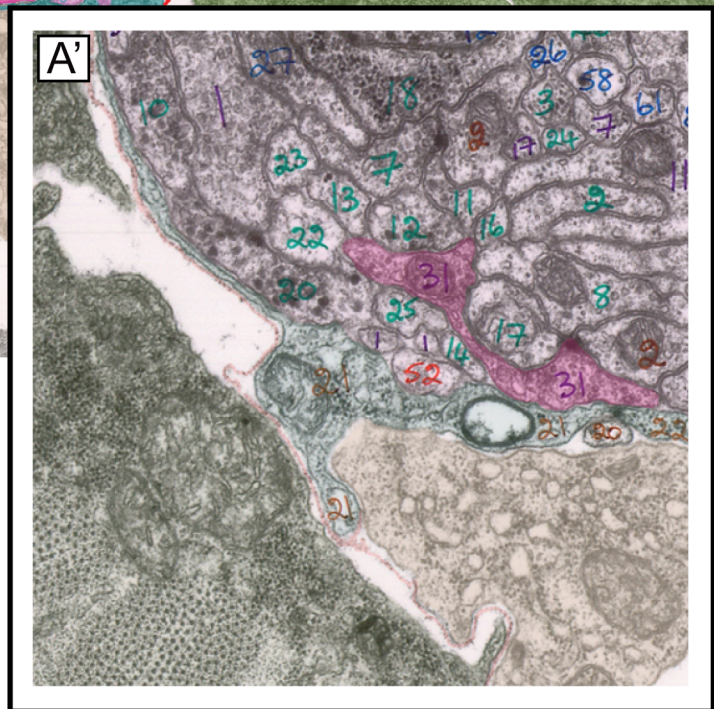

B

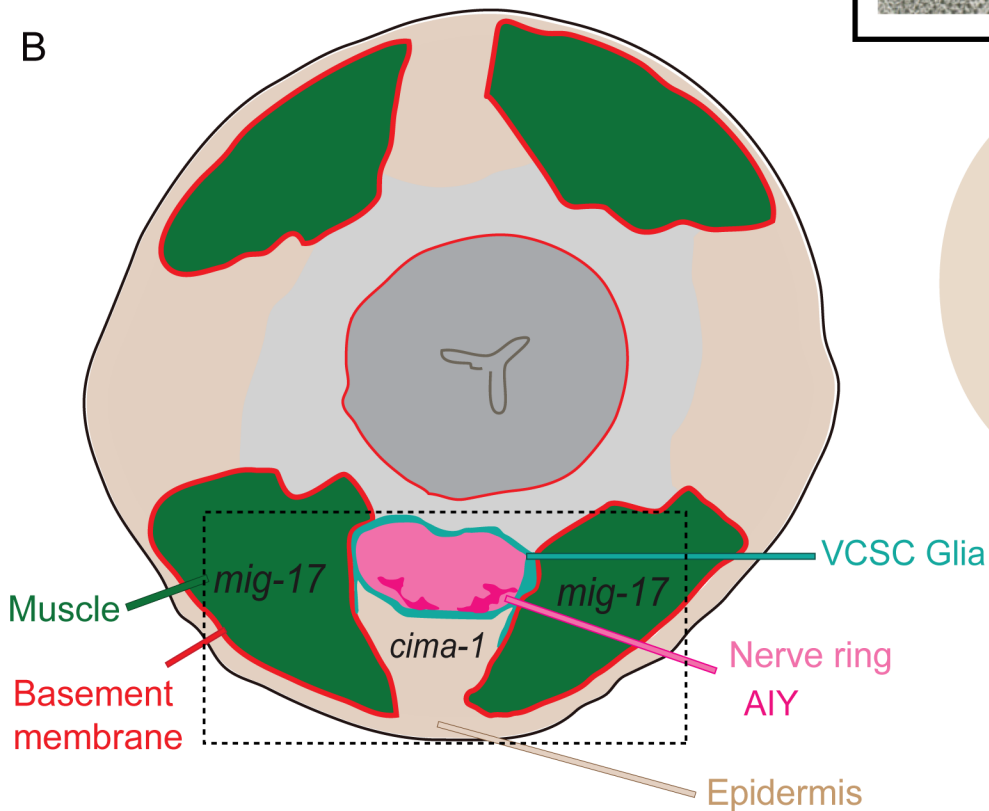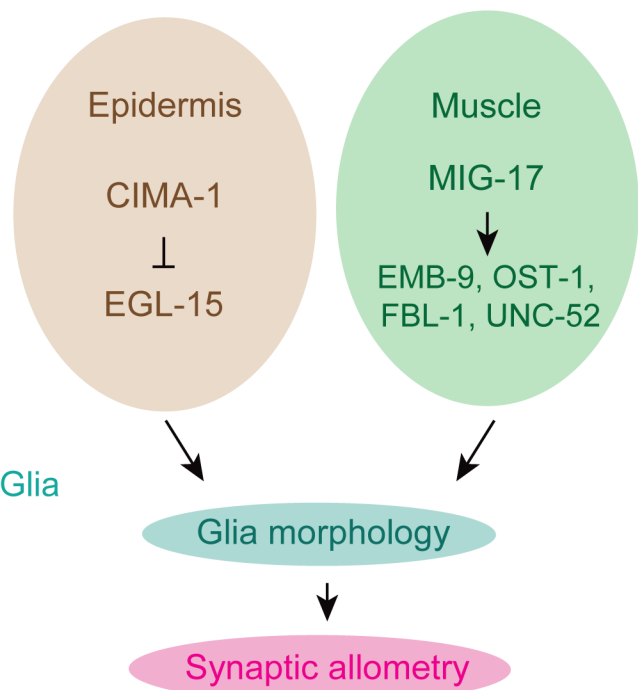

Source: http://biorxiv.org/content/10.1101/734830v1.full.pdf
